# Supplementary material for: Is early-onset cancer an emerging global epidemic? Current evidence and future implications
Source: Springer Nature journal article supplement (doi:10.1038/s41571-022-00672-8), 2022-09-06
Supplement: 41571_2022_672_MOESM1_ESM.pdf [file 41571_2022_672_MOESM1_ESM.pdf]

---

**Supplementary information**

---

**Is early-onset cancer an emerging global epidemic? Current evidence and future implications**

---

In the format provided by the authors and unedited

Supplementary Table 1. Trends in incidence of selected early-onset cancer types

| Country           | Breast cancer |      |      | Colorectal cancer |       |      |      |      |      | Endometrial cancer |       |      | Oesophageal cancer |       |      |      |       |      | Extrahepatic bile duct cancer and gallbladder cancer |       |      |       |       |      |
|-------------------|---------------|------|------|-------------------|-------|------|------|------|------|--------------------|-------|------|--------------------|-------|------|------|-------|------|------------------------------------------------------|-------|------|-------|-------|------|
|                   | Female        |      |      | Female            |       |      | Male |      |      | Female             |       |      | Female             |       |      | Male |       |      | Female                                               |       |      | Male  |       |      |
|                   | AAPC          | LCI  | UCI  | AAPC              | LCI   | UCI  | AAPC | LCI  | UCI  | AAPC               | LCI   | UCI  | AAPC               | LCI   | UCI  | AAPC | LCI   | UCI  | AAPC                                                 | LCI   | UCI  | AAPC  | LCI   | UCI  |
| Australia         | 0.5           | 0.2  | 0.8  | 1.8               | 0.9   | 2.6  | 2.7  | 1.7  | 3.7  | 1.7                | 0.2   | 3.2  | -0.8               | -5    | 3.6  | 0    | -1.9  | 1.9  | 2.4                                                  | -0.7  | 5.5  | -1.8  | -5.4  | 1.9  |
| Belarus           | 0.8           | 0    | 1.5  | -0.1              | -1.3  | 1.1  | 1.7  | 0.2  | 3.2  | 3.4                | 1.8   | 4.9  | 3.7                | -6.8  | 15.3 | 0.7  | -1.4  | 2.8  | 9.8                                                  | 1.1   | 19.2 | 1.3   | -3.4  | 6.2  |
| Brazil            | -1.7          | -3.4 | 0    | 0.7               | -4.1  | 5.6  | -0.2 | -4.1 | 3.7  | -2.2               | -10.1 | 6.4  | 4.9                | -10.6 | 23.2 | -7.3 | -12.1 | -2.3 | -7.2                                                 | -18   | 4.9  | 5.1   | -3.6  | 14.5 |
| Bulgaria          | 0.4           | 0.2  | 0.7  | 0.1               | -1.6  | 1.8  | -0.9 | -2.4 | 0.5  | 2.2                | 0.5   | 4    | 5.3                | -4.9  | 16.6 | 0.9  | -2.1  | 3.9  | -1.6                                                 | -8.9  | 6.4  | 4.1   | 0.2   | 8.1  |
| Canada            | 0.6           | 0.2  | 1    | 2.1               | 1.3   | 2.9  | 1.8  | 1    | 2.6  | 3.6                | 2.3   | 4.9  | 1.8                | -4.5  | 8.5  | 1.8  | -0.2  | 3.9  | 3.8                                                  | 0     | 7.7  | 3.6   | 0.9   | 6.4  |
| Chile             | -0.9          | -4.7 | 3    | -0.6              | -9.5  | 9.2  | -0.2 | -7.3 | 7.5  | -1                 | -14.6 | 14.7 | 1                  | -10.7 | 14.2 | -0.6 | -8.9  | 8.4  | -2.9                                                 | -9    | 3.5  | 1.4   | -6.9  | 10.4 |
| China             | 1.6           | 1.1  | 2.1  | -0.8              | -2.1  | 0.5  | 1.3  | 0.1  | 2.6  | 2.7                | 1.5   | 4    | -1.2               | -18.3 | 19.3 | -5.2 | -7.1  | -3.3 | -4                                                   | -6.8  | -1.2 | 0.7   | -2.8  | 4.3  |
| Colombia          | -1.2          | -2.2 | -0.3 | 4.5               | -5.6  | 15.7 | 4.5  | -6.6 | 16.9 | -2.1               | -6.9  | 3    | -6                 | -16.7 | 6.1  | -8.6 | -18.3 | 2.2  | -3.3                                                 | -10.3 | 4.3  | 2.7   | -7.1  | 13.5 |
| Costa Rica        | 0.6           | -1   | 2.2  | 1.4               | -2    | 4.9  | 2.6  | 0.3  | 4.9  | 1.6                | -4.9  | 8.6  | 3.6                | -10.5 | 19.9 | -    | -     | -    | -6                                                   | -13.1 | 1.7  | -13.4 | -24   | -1.2 |
| Croatia           | 1.5           | 0.1  | 2.9  | -0.9              | -2.9  | 1.1  | -2.4 | -4.3 | -0.4 | 5.1                | 2.2   | 8.2  | -8.9               | -16.9 | -0.1 | -5.1 | -8.2  | -1.8 | -7.6                                                 | -18.2 | 4.2  | -0.2  | -10.3 | 11.2 |
| Czech             | 1.9           | 1.1  | 2.6  | 0                 | -0.7  | 0.7  | -2.3 | -3.5 | -1.1 | 0.3                | -1    | 1.6  | -8.9               | -16.9 | -0.1 | -2.2 | -5.8  | 1.5  | -9.5                                                 | -14.7 | -4   | -8.5  | -13.1 | -3.7 |
| Denmark           | 0.5           | -0.2 | 1.2  | 2.2               | 0.9   | 3.5  | 0.5  | -0.5 | 1.5  | 1.6                | -1.8  | 5    | -0.7               | -7.9  | 7.1  | -4.3 | -10.4 | 2.2  | 4.8                                                  | -4.3  | 14.8 | -2.4  | -10.4 | 6.3  |
| Ecuador           | 0.9           | -0.8 | 2.5  | 4.8               | 0.8   | 8.9  | 3    | -3.2 | 9.7  | 6.7                | -2    | 16.2 | 3.6                | -6.4  | 14.5 | -4   | -14.2 | 7.4  | -4.6                                                 | -11.5 | 2.8  | -6.5  | -14.7 | 2.5  |
| Estonia           | 1.3           | -0.2 | 2.8  | 0.2               | -4.4  | 5    | 1.6  | -2.9 | 6.3  | 3.6                | -0.8  | 8.2  | 1.2                | -13   | 17.8 | -1.9 | -10.4 | 7.5  | 4.7                                                  | -8.1  | 19.4 | 4.8   | -4.1  | 14.5 |
| France            | 0.8           | 0    | 1.6  | 1.8               | 0.4   | 3.3  | -0.9 | -2.9 | 1.1  | -4.6               | -7.6  | -1.4 | 1.5                | 0.2   | 2.8  | -5.9 | -7.4  | -4.4 | 1.8                                                  | -3.8  | 7.6  | 1.1   | -9.2  | 12.5 |
| Germany           | 1.7           | 0.7  | 2.6  | 1.5               | -0.4  | 3.5  | 2    | 0    | 4.1  | 4.5                | 1.1   | 8    | 3.5                | -7    | 15.2 | 0    | -4    | 4.1  | 5.7                                                  | -0.8  | 12.6 | 4.9   | -3    | 13.4 |
| Iceland           | 1.1           | -0.7 | 2.9  | 1.3               | -8.1  | 11.5 | 4.4  | -4   | 13.5 | 2.1                | -8.2  | 13.5 | 0.1                | -8.6  | 9.6  | 2.3  | -7.2  | 12.7 | -                                                    | -     | -    | -1.1  | -39.1 | 60.6 |
| India             | -0.4          | -2.3 | 1.5  | 1                 | -2.1  | 4.2  | 2.9  | -0.1 | 6    | 3.4                | -3.4  | 10.7 | -4.6               | -8.4  | -0.6 | -7.6 | -13.3 | -1.4 | 6.6                                                  | 0     | 13.7 | 4.3   | -2.7  | 11.8 |
| Ireland           | 1.4           | 0.6  | 2.2  | 0.6               | -1.5  | 2.7  | 1.3  | -1   | 3.7  | 1.2                | -1.3  | 3.8  | -4.4               | -10.5 | 2.2  | -2.6 | -7    | 2    | -3.7                                                 | -12.1 | 5.6  | 0.5   | -8.1  | 9.9  |
| Israel            | -0.6          | -1.3 | 0.1  | -1.1              | -2.6  | 0.5  | 0    | -1   | 0.9  | -2.2               | -3.8  | -0.5 | -1.8               | -13.4 | 11.3 | -4.5 | -10.3 | 1.7  | -3                                                   | -10.5 | 5.2  | -9.3  | -16.3 | -1.6 |
| Italy             | 0.6           | -1   | 2.3  | -1                | -3.7  | 1.7  | -0.6 | -2.6 | 1.5  | 1                  | -1.9  | 3.9  | 1.6                | -7.7  | 11.8 | 3    | -3.8  | 10.2 | 3.9                                                  | -4.1  | 12.6 | 2.8   | -6    | 12.3 |
| Japan             | 3.4           | 2.5  | 4.3  | 1.8               | 0.5   | 3.1  | -0.9 | -2.3 | 0.4  | 9.4                | 4.9   | 14.2 | 6.8                | -0.8  | 14.9 | -3.8 | -7.3  | -0.1 | -5.1                                                 | -7.7  | -2.3 | -2.7  | -7.2  | 2    |
| Kuwait            | 0.9           | -1.4 | 3.3  | -0.4              | -7.1  | 6.7  | 6.3  | 0    | 13.1 | -                  | -     | -    | -8.6               | -     | -    | -1   | -11   | 10.1 | -7.5                                                 | -15.8 | 1.7  | -     | -     | -    |
| Latvia            | 0.8           | -0.2 | 1.9  | 2.2               | -1.2  | 5.9  | 1.3  | -1.3 | 3.9  | 0.3                | -3.2  | 4    | -1.8               | -8    | 4.9  | -2.3 | -7.8  | 3.4  | 0.7                                                  | -7.3  | 9.5  | -10.8 | -20.9 | 0.5  |
| Lithuania         | 0.4           | -0.6 | 1.4  | 0.7               | -2.1  | 3.5  | -2.3 | -4.1 | -0.4 | 0.9                | -2.1  | 3.9  | 12.8               | 6.5   | 19.5 | 0.9  | -2.2  | 4.1  | -3.8                                                 | -11.6 | 4.7  | -2.8  | -13.1 | 8.7  |
| Malta             | 2.7           | 0.8  | 4.6  | -2.3              | -11.6 | 8    | 0.9  | -6.3 | 8.7  | -10.5              | -18.7 | -1.3 | -                  | -     | -    | 6.4  | -3.2  | 17   | -                                                    | -     | -    | -     | -     | -    |
| New Zealand       | 1.4           | 0.7  | 2.1  | 0.6               | -1    | 2.3  | 2.5  | 0.9  | 4    | 5.6                | 3.8   | 7.5  | 8                  | -4.4  | 22.1 | -0.7 | -6.9  | 6    | 3.6                                                  | -6.9  | 15.3 | 2.3   | -7.5  | 13.2 |
| Norway            | 0.9           | 0    | 1.8  | 1                 | -0.9  | 2.9  | 0.7  | -1.1 | 2.5  | -0.8               | -3.5  | 2    | -1.3               | -9.3  | 7.4  | 4    | -0.8  | 9.1  | -0.6                                                 | -6.3  | 5.3  | -1.5  | -10.1 | 8    |
| Poland            | 0.5           | -1.7 | 2.8  | -0.4              | -3.2  | 2.5  | 1    | -2.4 | 4.5  | 0.1                | -4.5  | 4.9  | -                  | -     | -    | -7   | -16.5 | 3.7  | 0.4                                                  | -9.9  | 12   | 1.1   | -4.5  | 7.2  |
| Republic of Korea | 4.4           | 3.8  | 5    | 4.6               | 3.9   | 5.3  | 5.1  | 4.4  | 5.8  | 5.2                | 4     | 6.5  | 5.1                | -6.8  | 18.5 | -2.2 | -5    | 0.6  | -3.1                                                 | -5.1  | -0.9 | -0.5  | -2.5  | 1.4  |
| Slovakia          | 1.9           | 1.3  | 2.5  | 1.4               | -0.5  | 3.3  | 1.5  | -0.1 | 3.3  | 0.9                | -1    | 2.8  | -4.7               | -15.6 | 7.7  | -6.9 | -10.8 | -2.8 | -8.1                                                 | -15.3 | -0.2 | -8.9  | -25   | 10.7 |
| Slovenia          | 0.6           | -0.7 | 1.8  | 2.1               | -1    | 5.3  | 0.2  | -1.5 | 1.9  | -0.7               | -3.4  | 2.1  | -1.4               | -12.8 | 11.5 | -5.9 | -13.1 | 1.8  | -0.9                                                 | -11.7 | 11.3 | -4.1  | -12.2 | 4.7  |
| Spain             | 0.5           | -0.1 | 1.2  | -0.9              | -2.7  | 0.9  | -0.5 | -2.2 | 1.2  | -1.2               | -4.3  | 2.1  | 2.1                | -3.8  | 8.3  | -7.3 | -10.3 | -4.2 | -2.2                                                 | -7.5  | 3.4  | -0.7  | -11.7 | 11.8 |

|                      |               |       |      |      |      |      |        |       |      |      |       |      |        |       |      |      |       |      |         |       |      |      |       |      |
|----------------------|---------------|-------|------|------|------|------|--------|-------|------|------|-------|------|--------|-------|------|------|-------|------|---------|-------|------|------|-------|------|
| Sweden               | 0.8           | 0.1   | 1.5  | 1.1  | -0.5 | 2.7  | 2.6    | 1     | 4.2  | 2.1  | -0.8  | 5.1  | -1.2   | -9.6  | 8    | -0.6 | -4.7  | 3.7  | 2.4     | -2.6  | 7.8  | 6.9  | 1.6   | 12.5 |
| Switzerland          | 0.5           | -0.4  | 1.5  | 2.4  | -1.1 | 6    | 0.3    | -2.5  | 3.2  | 1.2  | -2.1  | 4.7  | -3.7   | -15.1 | 9.2  | -6.8 | -13.4 | 0.3  | 0.8     | -8.9  | 11.5 | -2.3 | -11   | 7.2  |
| Thailand             | 1.1           | 0.2   | 2.1  | 0.3  | -1.8 | 2.4  | 3.6    | 2.5   | 4.8  | 3.4  | -1.1  | 8    | -2.7   | -13.2 | 9    | 8.8  | 4.9   | 12.8 | 3.2     | -2.6  | 9.4  | 4    | -0.8  | 9    |
| The Netherlands      | 0.8           | 0.3   | 1.3  | 1.9  | 1.2  | 2.6  | 2.1    | 1.5   | 2.7  | -0.6 | -2.2  | 1    | -2.4   | -5.3  | 0.6  | -0.4 | -2.4  | 1.6  | -0.4    | -3.9  | 3.2  | 0.1  | -3.2  | 3.6  |
| Turkey               | 2.2           | 1.4   | 3    | 2.8  | 0.7  | 4.9  | 0.9    | -0.6  | 2.5  | 2.9  | 0.7   | 5.2  | 3.6    | -3.3  | 11.1 | -5.3 | -10.2 | -0.1 | -0.8    | -5.5  | 4.1  | 6.4  | -3.7  | 17.5 |
| UK, England & Wales  | 1.1           | 0.4   | 1.8  | 2.8  | 1.8  | 3.7  | 2.5    | 1.9   | 3.2  | 3.1  | 1.9   | 4.4  | -1     | -3    | 1.1  | -1.3 | -9.6  | 7.7  | 2.4     | 0.2   | 4.5  | 3.4  | 0     | 6.9  |
| UK, Northern Ireland | 0.3           | -0.7  | 1.4  | 1.4  | -1.7 | 4.6  | 4.3    | -0.3  | 9.1  | 2.8  | -0.1  | 5.7  | 1.1    | -7.4  | 10.3 | -0.3 | -1.8  | 1.3  | 7.5     | -0.5  | 16.2 | 3.8  | -8.3  | 17.6 |
| UK, Scotland         | 1             | 0.5   | 1.5  | 3.2  | 1.6  | 4.8  | 0.2    | -1.7  | 2.1  | -0.2 | -3.5  | 3.4  | -1.5   | -7.2  | 4.6  | 0.1  | -2    | 2.3  | 6.2     | -4.6  | 18.2 | -3   | -9.6  | 4    |
| Ukraine              | -0.2          | -0.8  | 0.4  | 0    | -1   | 1    | 0.1    | -0.7  | 0.9  | 0.9  | 0.1   | 1.7  | 6.3    | 1.2   | 11.7 | 0.8  | -2.2  | 3.9  | -1.4    | -4.7  | 2    | 3.3  | -0.7  | 7.5  |
| USA                  | 0.2           | 0     | 0.5  | 1.9  | 1.4  | 2.5  | 1.6    | 1.2   | 2    | 2.1  | 1.6   | 2.5  | -4.1   | -7.1  | -1   | -1.6 | -3    | -0.2 | 1       | -1.7  | 3.8  | 0.9  | -1.1  | 3    |
| Uganda               | 2.1           | -1.8  | 6.2  | 5.6  | -4   | 16.2 | -1.2   | -7.6  | 5.6  | -2.8 | -15.6 | 12   | 12     | 5     | 19.6 | 5    | 1     | 9.1  | 4.5     | -41.6 | 87.1 | -    | -     | -    |
| Country              | Head and neck |       |      |      |      |      | Kidney |       |      |      |       |      | Liver  |       |      |      |       |      | Myeloma |       |      |      |       |      |
|                      | Female        |       |      | Male |      |      | Female |       |      | Male |       |      | Female |       |      | Male |       |      | Female  |       |      | Male |       |      |
|                      | AAPC          | LCI   | UCI  | AAPC | LCI  | UCI  | AAPC   | LCI   | UCI  | AAPC | LCI   | UCI  | AAPC   | LCI   | UCI  | AAPC | LCI   | UCI  | AAPC    | LCI   | UCI  | AAPC | LCI   | UCI  |
| Australia            | 1.1           | -1    | 3.3  | -0.9 | -2   | 0.1  | 2.1    | 0.4   | 3.9  | 3.8  | 2     | 5.5  | 4.2    | 0.8   | 7.7  | 2.3  | 0.3   | 4.2  | 3       | -0.6  | 6.7  | 1.9  | -0.2  | 4.1  |
| Belarus              | 6             | 2.1   | 10.1 | 0.5  | -0.5 | 1.4  | 2      | 0.8   | 3.1  | 3.5  | 2.1   | 4.8  | 0.9    | -3.2  | 5.2  | 2.3  | -11.6 | 18.4 | 3       | 0     | 6    | 2    | -2.1  | 6.4  |
| Brazil               | 2             | -4.5  | 9    | -2.2 | -5   | 0.6  | 13.4   | 4.8   | 22.8 | -0.1 | -9.3  | 10   | -3.3   | -12.2 | 6.6  | 1.4  | -9.9  | 14.2 | -2.7    | -17   | 14   | 4.3  | -8.2  | 18.5 |
| Bulgaria             | 4.5           | 1.8   | 7.3  | -1.4 | -3   | 0.2  | 3.1    | -1.2  | 7.5  | 2.9  | -0.1  | 6    | 4.5    | -4.6  | 14.5 | -0.4 | -5.4  | 4.9  | 3.1     | -7.3  | 14.7 | 2.3  | -8.4  | 14.1 |
| Canada               | 0.4           | -0.9  | 1.7  | -0.6 | -1.5 | 0.4  | 1.6    | -0.3  | 3.7  | 2.8  | 1.7   | 4    | 5      | 2.2   | 7.9  | -2   | -3.6  | -0.4 | 1.5     | -0.7  | 3.9  | 0.8  | -0.8  | 2.3  |
| Chile                | -1.3          | -22.4 | 25.4 | 2.5  | -7.9 | 14   | 3      | -7.1  | 14.1 | -7.5 | -12   | -2.8 | -9.8   | -27.7 | 12.6 | 5.9  | -7.7  | 21.6 | -0.9    | -24   | 29.1 | -3.2 | -11.5 | 5.9  |
| China                | -1.6          | -2.6  | -0.6 | -1.4 | -2.3 | -0.5 | 3.1    | 0.4   | 5.9  | 7.5  | 5.7   | 9.3  | -3.3   | -4.8  | -1.8 | -5.7 | -7.8  | -3.5 | 1.3     | -7.2  | 10.6 | -1.9 | -4.4  | 0.6  |
| Colombia             | 2.6           | -0.1  | 5.3  | -0.2 | -5.4 | 5.2  | -2.6   | -15.3 | 11.9 | -1.5 | -11.6 | 9.7  | 2.7    | -6.4  | 12.7 | -8.5 | -19.9 | 4.6  | 1.6     | -8.4  | 12.7 | -2.1 | -11.3 | 8.1  |
| Costa Rica           | -1.3          | -8.2  | 6    | -4.7 | -8.6 | -0.6 | -2.6   | -8.7  | 4    | 0.1  | -5.6  | 6.2  | 1.6    | -5.1  | 8.8  | -6.7 | -12.2 | -0.7 | -1.2    | -15.5 | 15.6 | -2.3 | -11.9 | 8.3  |
| Croatia              | -0.1          | -4.1  | 4.1  | -5.9 | -7.9 | -3.9 | 0.2    | -3.3  | 3.7  | -0.4 | -2.4  | 1.7  | -5.4   | -10   | -0.6 | -2.2 | -7    | 2.8  | -2      | -6.8  | 3    | -6.5 | -10.8 | -2   |
| Czech                | 1.7           | -0.6  | 4.1  | -3.5 | -4.7 | -2.2 | -1.6   | -3.8  | 0.5  | -0.5 | -1.8  | 0.8  | -1.7   | -8.7  | 5.7  | -5.7 | -8.7  | -2.5 | 0.5     | -4.3  | 5.5  | -0.4 | -6.6  | 6.2  |
| Denmark              | -1.3          | -3.9  | 1.4  | -2   | -3.9 | -0.1 | 7.1    | 1     | 13.6 | 6    | 3.8   | 8.1  | -0.6   | -8.4  | 7.9  | -3.7 | -10.1 | 3.1  | 4.7     | 0.8   | 8.9  | 0.1  | -3.9  | 4.3  |
| Ecuador              | 4.6           | -4.2  | 14.3 | 25.5 | 18.3 | 33.1 | 4.4    | -4.9  | 14.5 | 12.1 | -21.9 | 60.7 | 1.8    | -7.2  | 11.7 | 2.7  | -3    | 8.8  | -1.1    | -6.7  | 4.9  | 3.5  | -4.6  | 12.2 |
| Estonia              | 4.3           | -4.5  | 14   | -3.6 | -8.7 | 1.7  | 0.7    | -6.1  | 7.9  | -0.2 | -4.6  | 4.5  | -3.1   | -12.5 | 7.5  | 3.3  | -4.4  | 11.6 | -4.5    | -16.5 | 9.1  | 4.1  | -1.3  | 9.8  |
| France               | 0.7           | -2.5  | 4    | -7.7 | -9   | -6.4 | 4.9    | 2     | 8    | 2.7  | 0.2   | 5.2  | -1.6   | -7.3  | 4.4  | 3.1  | -0.1  | 6.5  | 2.5     | -3.3  | 8.7  | 1.5  | -1.8  | 4.9  |
| Germany              | -6.3          | -10.2 | -2.2 | -6.9 | -9.4 | -4.4 | 3.3    | -0.2  | 7    | -1.2 | -4.3  | 2    | 3.5    | -3.4  | 11   | 4.2  | -2.3  | 11.2 | -0.1    | -8.3  | 8.7  | 2.1  | -5    | 9.8  |
| Iceland              | -6.5          | -16   | 4.2  | 2.6  | -6.5 | 12.6 | 4      | -14.3 | 26   | 0.6  | -5.4  | 6.9  | -2.8   | -12.7 | 8.3  | 5.9  | -28.5 | 56.8 | -2.7    | -15.3 | 11.8 | -0.4 | -1.8  | 1.1  |
| India                | 1             | -1.7  | 3.8  | 3.9  | 2.6  | 5.2  | 3.9    | -8.6  | 18   | -0.8 | -8    | 7    | 1.1    | -10.6 | 14.4 | 1.5  | -4.2  | 7.6  | -0.1    | -7.7  | 8.1  | 6.4  | 2.5   | 10.5 |
| Ireland              | 7.9           | 3.3   | 12.7 | 1.8  | -1.4 | 5.1  | 4.6    | 1.8   | 7.4  | 4.9  | 1.8   | 8    | 4      | -6.7  | 15.9 | 9.3  | 4.8   | 14   | 0.6     | -6.3  | 8.1  | -0.4 | -8.1  | 7.9  |
| Israel               | 0             | -3.5  | 3.5  | -3.5 | -6.5 | -0.3 | 0.7    | -1.9  | 3.4  | 0.7  | -2.2  | 3.7  | -0.5   | -5.7  | 5    | -0.1 | -7.9  | 8.5  | -5.8    | -12   | 0.9  | -0.5 | -3.1  | 2.2  |
| Italy                | -0.4          | -6.6  | 6.1  | 0    | -2.3 | 2.2  | 2.4    | -2    | 7    | 4.4  | 1.5   | 7.3  | 5.9    | -5.5  | 18.6 | 2.7  | -0.5  | 6    | -4.2    | -12   | 4.3  | -0.8 | -5.6  | 4.3  |
| Japan                | 4.9           | 0.9   | 9.2  | 1.7  | -1.3 | 4.8  | 6.3    | 2.1   | 10.7 | 6.5  | 4.1   | 8.9  | -2.2   | -8.4  | 4.4  | -6.6 | -8.1  | -5.1 | 2.6     | -2.5  | 7.9  | -1.7 | -11.8 | 9.4  |
| Kuwait               | -2.2          | -12.9 | 9.8  | 1.3  | -6.2 | 9.5  | 2.2    | -14.8 | 22.8 | 7.3  | -2.7  | 18.4 | -6.4   | -13.1 | 0.8  | -2.9 | -22.1 | 21   | -5.3    | -10.9 | 0.6  | 5.5  | -18.4 | 36.5 |
| Latvia               | 2.5           | -7    | 13   | 2.9  | -1.5 | 7.5  | 2.9    | -2.8  | 8.9  | 2.4  | -0.7  | 5.6  | -6.3   | -16.5 | 5.2  | 2.2  | -3.2  | 7.8  | 8.6     | -0.5  | 18.6 | 7.6  | -31.2 | 68.2 |

|                      |                   |       |      |      |       |      |                 |       |      |                |       |      |       |       |      |                |       |      |      |       |      |      |       |      |
|----------------------|-------------------|-------|------|------|-------|------|-----------------|-------|------|----------------|-------|------|-------|-------|------|----------------|-------|------|------|-------|------|------|-------|------|
| Lithuania            | 1.1               | -4.1  | 6.6  | -0.3 | -3.3  | 2.8  | 3               | 0.2   | 5.8  | 2.8            | 0.9   | 4.7  | -1.4  | -12.7 | 11.3 | 7.9            | 1.5   | 14.8 | 5.9  | -1.1  | 13.4 | 10.2 | 2.6   | 18.3 |
| Malta                | 5.8               | -1.5  | 13.6 | 3.2  | -4.3  | 11.4 | 12.3            | -0.9  | 27.3 | 4.1            | -4.6  | 13.5 | -     | -     | -    | 6.5            | -14.4 | 32.5 | 1.7  | -0.4  | 3.8  | 6    | -4.3  | 17.5 |
| New Zealand          | 0.1               | -2.5  | 2.8  | 1.4  | -0.1  | 2.9  | 0.7             | -2.6  | 4.2  | 4.5            | 2     | 7    | -1.2  | -6.5  | 4.4  | 0.3            | -3.9  | 4.7  | 2.4  | -3    | 8.1  | 2.6  | -1.3  | 6.6  |
| Norway               | 4.5               | 0.8   | 8.3  | -2.3 | -5.1  | 0.7  | 6.6             | 0.9   | 12.7 | 3.3            | -0.7  | 7.6  | 4.7   | -8.1  | 19.3 | 6              | 0.8   | 11.5 | 1.6  | -4.4  | 7.9  | 0.9  | -4.8  | 7    |
| Poland               | 0.6               | -8.1  | 10   | 0.2  | -5.6  | 6.4  | -1.5            | -5.1  | 2.3  | -1.3           | -5.8  | 3.4  | -0.3  | -10.6 | 11.2 | 5.2            | -5.3  | 16.7 | -7.9 | -14.4 | -0.9 | -3.8 | -11.8 | 4.9  |
| Republic of Korea    | 3                 | 1.7   | 4.3  | 2.6  | 1.1   | 4.1  | 6.5             | 4.3   | 8.9  | 6.6            | 5.3   | 7.9  | -2.5  | -3.6  | -1.3 | -4.5           | -6.5  | -2.4 | 5.1  | 1.4   | 8.9  | 1.3  | -1.2  | 3.9  |
| Slovakia             | 1.2               | -3.6  | 6.2  | -6.3 | -7.5  | -5.1 | 4.2             | 1.1   | 7.5  | 5.3            | 3     | 7.6  | 3.4   | -2.9  | 10.1 | 0.3            | -4.9  | 5.8  | 0.9  | -3.8  | 5.9  | 4.8  | -2.2  | 12.3 |
| Slovenia             | -0.6              | -5.1  | 4.1  | -3.4 | -5.8  | -1   | -0.2            | -4.4  | 4.1  | 3.9            | 0.1   | 7.9  | -2.4  | -10.9 | 6.8  | -7.2           | -14.3 | 0.5  | 8.8  | -2.5  | 21.3 | -3.3 | -16.9 | 12.4 |
| Spain                | -3.4              | -6.7  | -0.1 | -6.8 | -8.5  | -5.1 | 0.5             | -2.3  | 3.3  | -0.5           | -2.8  | 1.8  | 0.4   | -6.5  | 7.9  | 5.5            | 2     | 9.1  | 3.7  | -2.3  | 10   | -0.7 | -5.5  | 4.4  |
| Sweden               | 0.6               | -1.5  | 2.7  | -0.4 | -2.1  | 1.3  | 2.5             | -0.9  | 5.9  | 3.8            | 1.3   | 6.3  | 3.5   | -9.8  | 18.9 | 2.5            | -0.6  | 5.6  | 2.1  | -2.3  | 6.6  | -0.9 | -7.9  | 6.7  |
| Switzerland          | 0.6               | -3.7  | 5.1  | -5.4 | -8.1  | -2.6 | 1.8             | -3.3  | 7.2  | 1.4            | -0.8  | 3.6  | 2.3   | -6.5  | 11.8 | -3.8           | -7    | -0.5 | 7.8  | -0.6  | 16.8 | -0.4 | -9.3  | 9.4  |
| Thailand             | -0.8              | -2.4  | 0.8  | 0.9  | -1.1  | 3    | 2.8             | -7.2  | 14   | 6              | -2    | 14.5 | -3.6  | -6.1  | -1.1 | -0.8           | -2.4  | 0.9  | 0.3  | -7.3  | 8.6  | 5.6  | -2.8  | 14.8 |
| The Netherlands      | -0.4              | -2.3  | 1.5  | -1.9 | -4    | 0.2  | 3.9             | 1.5   | 6.4  | 3.8            | 2.6   | 5.1  | 4.7   | -0.7  | 10.3 | 2.2            | -0.5  | 5    | 0.4  | -2.8  | 3.8  | 0.3  | -1.7  | 2.3  |
| Turkey               | 0.8               | -2.5  | 4.1  | 1.1  | -1.1  | 3.3  | 4.8             | 2.3   | 7.4  | 5.8            | 2.9   | 8.8  | -3.4  | -8.2  | 1.6  | -1.8           | -6    | 2.5  | 6.7  | -1.3  | 15.4 | 2.1  | -1    | 5.3  |
| UK, England & Wales  | 2.8               | 1.5   | 4.1  | 2.4  | 2.1   | 2.7  | 4               | 2.9   | 5.1  | 4.1            | 3.2   | 5    | 4.8   | 2.8   | 7    | 2              | -0.5  | 4.5  | 4.7  | 2.5   | 6.9  | 2.8  | 0.9   | 4.7  |
| UK, Northern Ireland | 9.1               | 3.8   | 14.7 | 3.5  | -1.2  | 8.5  | 2.8             | -4.2  | 10.3 | 6.1            | 2.2   | 10.1 | 0.2   | -8.7  | 10   | 4.9            | -5.3  | 16.3 | 0.6  | -9.3  | 11.7 | -3.5 | -13.3 | 7.4  |
| UK, Scotland         | 4.7               | 0     | 9.5  | 0.1  | -4.4  | 4.8  | 6.1             | 2.3   | 10.1 | 3.2            | 1.3   | 5.2  | 3.2   | -3.4  | 10.1 | 5.8            | 1     | 10.9 | 2.4  | -4.4  | 9.7  | 2.8  | -2.5  | 8.5  |
| Ukraine              | 1                 | -0.7  | 2.7  | -0.1 | -1.8  | 1.6  | 1.6             | 0     | 3.3  | 1.3            | 0.3   | 2.3  | -1.3  | -6.8  | 4.5  | -1.6           | -4.6  | 1.5  | -1.3 | -4.9  | 2.5  | 0.8  | -2.7  | 4.5  |
| USA                  | -0.4              | -1.5  | 0.6  | -0.9 | -2    | 0.1  | 3.6             | 2.3   | 4.9  | 4.1            | 3.4   | 4.9  | 0.4   | -2    | 2.7  | -1.6           | -5.6  | 2.4  | 2    | -0.6  | 4.7  | 3    | 1.3   | 4.8  |
| Uganda               | -2.5              | -9.8  | 5.5  | -0.3 | -8.1  | 8.2  | 1.6             | -10.4 | 15.1 | -2.1           | -19.3 | 18.9 | 9.5   | 2     | 17.6 | 6.6            | 0.9   | 12.7 | 6.8  | -11.8 | 29.3 | 0.7  | -13.2 | 16.9 |
| Country              | Pancreatic cancer |       |      |      |       |      | Prostate cancer |       |      | Stomach cancer |       |      |       |       |      | Thyroid cancer |       |      |      |       |      |      |       |      |
|                      | Female            |       |      | Male |       |      | Male            |       |      | Female         |       |      | Male  |       |      | Female         |       |      | Male |       |      |      |       |      |
|                      | AAPC              | LCI   | UCI  | AAPC | LCI   | UCI  | AAPC            | LCI   | UCI  | AAPC           | LCI   | UCI  | AAPC  | LCI   | UCI  | AAPC           | LCI   | UCI  | AAPC | LCI   | UCI  | AAPC | LCI   | UCI  |
| Australia            | 1.7               | 0.4   | 3    | 1.6  | -0.2  | 3.4  | 12              | 7     | 17.3 | -1.1           | -3.2  | 1.1  | -1.2  | -3    | 0.6  | 4.1            | 3.6   | 4.6  | 4.9  | 3.2   | 6.6  |      |       |      |
| Belarus              | 0.2               | -3.1  | 3.6  | 2.5  | 0.9   | 4.2  | 7               | 3.2   | 10.8 | -1.7           | -3.8  | 0.5  | -2.8  | -3.3  | -2.2 | 1.6            | 0.7   | 2.5  | 0    | -1.7  | 1.8  |      |       |      |
| Brazil               | 1.6               | -8.4  | 12.7 | 2.9  | -5.7  | 12.4 | 9               | 3.8   | 14.4 | -1.9           | -6.3  | 2.8  | -2.1  | -8.1  | 4.3  | 4.1            | 0.5   | 7.7  | 6.6  | 0.8   | 12.9 |      |       |      |
| Bulgaria             | 0.9               | -3.4  | 5.4  | -1   | -3.4  | 1.4  | -2.7            | -9.5  | 4.6  | -0.8           | -2.2  | 0.5  | -2.8  | -5.2  | -0.4 | 5              | 2.7   | 7.4  | 4.4  | 0.5   | 8.5  |      |       |      |
| Canada               | 2.2               | 0.4   | 4    | 2.6  | 0.8   | 4.4  | 2               | -0.7  | 4.7  | 1.9            | 0.2   | 3.6  | 0.1   | -2    | 2.2  | 4.6            | 3.8   | 5.4  | 6.3  | 5     | 7.7  |      |       |      |
| Chile                | -1.8              | -12.8 | 10.7 | -3   | -15.5 | 11.3 | -1.9            | -10.5 | 7.5  | -6.6           | -13.3 | 0.6  | -12.2 | -22.8 | -0.1 | 7.4            | 0.8   | 14.4 | 0.7  | -7.7  | 9.8  |      |       |      |
| China                | -3.5              | -8.4  | 1.6  | -0.6 | -3.8  | 2.7  | 18.1            | 12.2  | 24.2 | -3.1           | -4.6  | -1.6 | -5.5  | -6.4  | -4.7 | 12.7           | 11.4  | 14.1 | 16.9 | 13.7  | 20.3 |      |       |      |
| Colombia             | -6                | -13.9 | 2.7  | 8    | -4.4  | 21.9 | 5.3             | -5.1  | 16.8 | 1              | -2.9  | 5.2  | -1.4  | -5.1  | 2.4  | 3.1            | 0.2   | 6.2  | 4.3  | -1.3  | 10.2 |      |       |      |
| Costa Rica           | -4.1              | -9.6  | 1.8  | -2.9 | -6    | 0.4  | 7.3             | 0.9   | 14.1 | 0.8            | -2.2  | 4    | -3.5  | -5    | -2   | 8.4            | 7     | 9.8  | 9.1  | 3.8   | 14.8 |      |       |      |
| Croatia              | 0.3               | -5    | 5.8  | -3.4 | -7.5  | 1    | 2.5             | -4    | 9.4  | -4.9           | -8.6  | -1.1 | -3.9  | -6.1  | -1.6 | 4.6            | 1.2   | 8.1  | 5.3  | 2.3   | 8.3  |      |       |      |
| Czech                | 1.9               | -0.9  | 4.8  | -1.2 | -3    | 0.6  | 13.3            | 9.5   | 17.1 | -1.6           | -4    | 0.8  | -2.2  | -4.4  | -0.1 | 7.2            | 5.4   | 9.1  | 6.8  | 4.8   | 8.8  |      |       |      |
| Denmark              | 0.1               | -3.8  | 4.1  | -0.7 | -4.5  | 3.1  | 15.2            | 9.3   | 21.5 | 0.1            | -5.1  | 5.6  | -1.8  | -6.1  | 2.7  | 5.3            | 4.1   | 6.6  | 6.3  | 2.5   | 10.1 |      |       |      |
| Ecuador              | -6.5              | -20.2 | 9.4  | -3   | -11.6 | 6.4  | 10.5            | 3.1   | 18.3 | 3.9            | 1.2   | 6.7  | 0.5   | -2.6  | 3.7  | 14.6           | 12.6  | 16.7 | 14.8 | 5.7   | 24.6 |      |       |      |
| Estonia              | -3.5              | -10.8 | 4.3  | -4   | -8.3  | 0.6  | 22.6            | 13.1  | 32.9 | -4.3           | -9.5  | 1.2  | -2.8  | -5.7  | 0.2  | 0.8            | -4.1  | 6    | 4.4  | -6.3  | 16.4 |      |       |      |
| France               | 1.2               | -2.7  | 5.2  | 4    | 0.9   | 7.3  | 5.9             | 1.7   | 10.2 | -3.4           | -7.3  | 0.7  | -0.3  | -3.2  | 2.6  | 4.3            | 3.3   | 5.2  | 3    | 0.5   | 5.6  |      |       |      |

|                      |      |       |      |      |       |      |      |       |      |       |       |      |      |       |      |      |      |      |      |       |      |
|----------------------|------|-------|------|------|-------|------|------|-------|------|-------|-------|------|------|-------|------|------|------|------|------|-------|------|
| Germany              | 1.6  | -4.3  | 7.9  | -2.3 | -18.1 | 16.6 | 1.9  | -1.7  | 5.5  | -2.2  | -7.7  | 3.7  | -2.5 | -4.8  | -0.1 | 5.9  | 0.8  | 11.3 | 2.8  | -1.4  | 7.2  |
| Iceland              | -0.3 | -13.2 | 14.5 | 0.5  | -13.9 | 17.2 | 10.6 | 1.7   | 20.2 | -1.2  | -9.5  | 7.8  | 4.9  | -7.3  | 18.7 | 1.7  | -4.7 | 8.5  | -0.5 | -13.7 | 14.8 |
| India                | 0.2  | -7.8  | 9    | 5.7  | -1.7  | 13.7 | 3.2  | -9.3  | 17.3 | 0.6   | -2.5  | 3.9  | -0.9 | -3.8  | 2.1  | 0.2  | -3.7 | 4.2  | 1.1  | -7.6  | 10.7 |
| Ireland              | -1.1 | -6.8  | 4.8  | -1.4 | -7.7  | 5.4  | 12.1 | 9.1   | 15.3 | -0.2  | -3.7  | 3.4  | -1.2 | -3.6  | 1.2  | 10.1 | 7.6  | 12.7 | 8.2  | 3.7   | 12.9 |
| Israel               | -3.1 | -6.9  | 0.8  | -2.6 | -6.5  | 1.4  | 0.7  | -5.8  | 7.7  | -1.4  | -4.8  | 2.1  | -1.4 | -4.2  | 1.4  | 3.4  | 2.4  | 4.3  | 4.7  | 1.4   | 8.1  |
| Italy                | 0.6  | -5    | 6.5  | 2.1  | -3.5  | 8    | 11.4 | 5.8   | 17.4 | -4.6  | -8.3  | -0.8 | -4.5 | -8.8  | 0.1  | 3.3  | -2.2 | 9.2  | 6.2  | 3     | 9.5  |
| Japan                | 2.8  | -2.8  | 8.7  | -0.5 | -5.6  | 4.9  | 22   | 8.6   | 36.9 | -3.5  | -5.7  | -1.2 | -5   | -6.7  | -3.3 | 6.5  | 3.8  | 9.3  | 6.9  | 2.4   | 11.5 |
| Kuwait               | 0.7  | -7.1  | 9.2  | -8   | -20.2 | 6    | 2.9  | -27.7 | 46.7 | 4.2   | -4.9  | 14.3 | -9.7 | -23.3 | 6.3  | 4.9  | 1    | 8.8  | -1.4 | -5.9  | 3.4  |
| Latvia               | -8   | -15.3 | -0.1 | -1   | -6.1  | 4.4  | 6.1  | -1    | 13.8 | 0.3   | -4.5  | 5.3  | -4.6 | -7.2  | -2   | 13.1 | 9.6  | 16.6 | 10.8 | 5.9   | 16   |
| Lithuania            | -0.1 | -4.2  | 4.2  | -3.6 | -6.1  | -1.1 | 12.4 | -1.6  | 28.3 | -0.7  | -4.3  | 3    | -1.3 | -3.6  | 1    | 2.7  | 0    | 5.6  | 7.6  | 3.4   | 12   |
| Malta                | -4.4 | -11.7 | 3.5  | -2.7 | -12   | 7.7  | -4.8 | -13.8 | 5.2  | -0.3  | -10.6 | 11.2 | 4.7  | -6.2  | 16.8 | 6.1  | -1.9 | 14.9 | 12.1 | -0.1  | 25.8 |
| New Zealand          | 4.8  | -1.6  | 11.7 | 3.1  | -3.1  | 9.7  | 3.7  | 0.1   | 7.4  | 1     | -2.9  | 5    | 1.8  | -1.6  | 5.3  | 4    | 1.5  | 6.4  | 4.4  | 0.6   | 8.3  |
| Norway               | -0.2 | -5.1  | 4.9  | 0.8  | -3.1  | 4.8  | 9    | 6.3   | 11.9 | -5.5  | -9.3  | -1.5 | 3.3  | 0.3   | 6.4  | 3.7  | 1.7  | 5.8  | 4.2  | 0.5   | 7.9  |
| Poland               | -2.1 | -12.5 | 9.5  | -4.7 | -10.2 | 1.1  | 2.4  | -6.7  | 12.4 | 5.2   | -6.4  | 18.2 | 2.8  | -2.7  | 8.6  | 3.3  | -0.4 | 7.2  | 6.9  | -2.4  | 17.2 |
| Republic of Korea    | 1.9  | -0.6  | 4.4  | 0.6  | -1.6  | 2.7  | 16.3 | 10.1  | 22.8 | 0.2   | -1.5  | 1.9  | -1   | -1.7  | -0.3 | 21   | 17.5 | 24.6 | 27.5 | 23.2  | 32   |
| Slovakia             | 2.7  | -5.9  | 12.2 | 0.5  | -2.7  | 3.8  | 8.6  | 2.7   | 14.9 | -     | -     | -    | -2   | -3.4  | -0.7 | -    | -    | -    | 6.9  | 1.7   | 12.3 |
| Slovenia             | -5   | -10.3 | 0.7  | -4.7 | -9.1  | -0.1 | 16.2 | 10.5  | 22.1 | 0.5   | -3.6  | 4.8  | 1.6  | -2.6  | 6    | 3.7  | -0.1 | 7.7  | 3    | -0.4  | 6.5  |
| Spain                | 0.7  | -5.1  | 6.8  | -2.5 | -6.1  | 1.2  | 7.5  | 3.2   | 11.9 | -2.1  | -5.3  | 1.2  | -3.5 | -5.8  | -1   | 5.5  | 3    | 8.1  | 6.3  | 3.4   | 9.3  |
| Sweden               | 3.9  | 0.1   | 7.8  | 0.8  | -2.4  | 4.1  | 5    | -2.5  | 13   | -1.8  | -6.9  | 3.6  | -3.4 | -6.4  | -0.3 | 4.7  | 2.9  | 6.5  | 9.2  | 4.6   | 13.9 |
| Switzerland          | 5.7  | -3.7  | 16.2 | 2.9  | -3.7  | 9.9  | 7.8  | 0.7   | 15.4 | 0.5   | -4.7  | 5.8  | -1.7 | -6.1  | 3    | 6.5  | 4    | 9    | 2.8  | -2.3  | 8.2  |
| Thailand             | 6.3  | -3.5  | 17.2 | 0.1  | -4.7  | 5.2  | -4.9 | -14.4 | 5.6  | 1.3   | -2.5  | 5.3  | -1.5 | -3.8  | 0.9  | -0.6 | -2.9 | 1.7  | 0.5  | -3.7  | 5    |
| The Netherlands      | 0.5  | -2.6  | 3.7  | 0.4  | -3    | 3.9  | 4.9  | 1.4   | 8.4  | 0.4   | -2.7  | 3.6  | -1.7 | -3.6  | 0.3  | 3.9  | 2.2  | 5.6  | 5    | 1.7   | 8.3  |
| Turkey               | 1.9  | -3    | 7    | 3.2  | -0.1  | 6.6  | 7.8  | -1.3  | 17.7 | -1.3  | -4.5  | 1.9  | -1.7 | -4    | 0.6  | 17.6 | 9.6  | 26.1 | 16.4 | 12.3  | 20.6 |
| UK, England & Wales  | 2.5  | 0.8   | 4.2  | 1.7  | -0.4  | 3.8  | 9.1  | 7.3   | 10.9 | 0.5   | -1.4  | 2.5  | -2   | -3.3  | -0.7 | 7.2  | 6.7  | 7.7  | 7.4  | 5.9   | 9    |
| UK, Northern Ireland | -0.6 | -6.7  | 5.9  | 3.5  | -5.4  | 13.2 | 15.8 | 8.2   | 24.1 | 3.8   | -0.8  | 8.6  | -8.5 | -14.1 | -2.6 | 7.4  | 1.7  | 13.4 | -0.6 | -7.3  | 6.5  |
| UK, Scotland         | 2.3  | -1.7  | 6.6  | -2.3 | -6.3  | 1.9  | 4    | -1.7  | 10.2 | -1.4  | -5.2  | 2.6  | -2   | -4.6  | 0.6  | 4.3  | 2    | 6.8  | 4.3  | 0.7   | 8.1  |
| Ukraine              | 1.8  | 0.4   | 3.3  | -1.4 | -2.2  | -0.7 | 3.2  | -0.1  | 6.5  | -4    | -5.2  | -2.7 | -4.3 | -5.1  | -3.5 | 5.3  | 4    | 6.7  | 5.6  | 4.7   | 6.5  |
| USA                  | 2.5  | 1.1   | 3.9  | -0.1 | -1.8  | 1.6  | -0.3 | -2.8  | 2.1  | 2.6   | 1.5   | 3.7  | 0.8  | -0.3  | 1.9  | 4.6  | 3.8  | 5.5  | 5.1  | 4.1   | 6.1  |
| Uganda               | -1   | -19.3 | 21.5 | 4.6  | -6.5  | 16.9 | -6.5 | -14.3 | 2    | -12.3 | -22.4 | -1   | -2.8 | -13   | 8.5  | 7.6  | -1.7 | 17.8 | -2.2 | -14.4 | 11.6 |

Trends in the incidence of 14 cancer types with increasing incidences among 20-49 year-old adults during the period of 2002-2012, by country and region. Age-standardized cancer incidence data were obtained from the Global Cancer Observatory (GLOBOCAN; <https://gco.iarc.fr/>). The 44 countries shown have provided age-standardized cancer incidence data during 2002-2012. Average annual percentage changes (AAPCs) with 95% confidence intervals (shown as horizontal bars) in incidence were calculated using the Joinpoint Regression Program (version 4.9.0.1) for data obtained for 2002–2012, excluding the following countries owing to differences in data availability: Costa Rica (2000–2010); Japan (2000–2010); Slovakia: (2000–2010); Spain: (2000–2010); Ukraine: (2003–2012). A maximum of two joinpoints were permitted in this analysis. Although extrahepatic bile duct cancer and gallbladder cancer (EBDC & GC) are distinct cancer types, making precise classifications is often difficult, hence, these cancer types are often recorded and data calculated together. Data were not available for the following countries: oesophageal cancer: Costa Rica (men), Poland (women), Malta (women); EBDC & GC: Uganda (men), Kuwait (men), Iceland (women), Malta (men and women); liver cancer: Malta (women); stomach cancer: Slovakia (women); thyroid cancer: Slovakia (women). AAPC, annual average percent increase; LCI, lower 95% confidence interval limit; U.K., United Kingdom; U.S.A., United States of America; UPI, upper 95% confidence interval limit.

Supplementary Table 2. Summary of studies on risk factors for early-onset breast cancer

| Study, country                                         | Study design                                                                                                                          | Participants                                                                                                           | Exposures                                                                     | Results (RR, HR, OR, or descriptive statistics)                                                                                                                                                                                                                                                                                                                                                                                                                                                   |
|--------------------------------------------------------|---------------------------------------------------------------------------------------------------------------------------------------|------------------------------------------------------------------------------------------------------------------------|-------------------------------------------------------------------------------|---------------------------------------------------------------------------------------------------------------------------------------------------------------------------------------------------------------------------------------------------------------------------------------------------------------------------------------------------------------------------------------------------------------------------------------------------------------------------------------------------|
| Al-Ajmi et al. 2018, U.K. <sup>1</sup>                 | Prospective cohort study                                                                                                              | 273,467 females (61,903 premenopausal women and 618 premenopausal breast cancer cases)                                 | Menarche age (years), parity, first live birth age (years), contraceptive use | <u>RR for premenopausal breast cancer</u><br>Menarche age (years): RR, 0.95 (95% CI, 0.90-1.00), parity (vs. no): RR, 0.76 (95% CI, 0.64-0.91), first live birth age (years): RR, 1.02 (95% CI, 1.00-1.05), contraceptive use (vs. no): RR, 1.26 (95% CI, 0.95-1.67)                                                                                                                                                                                                                              |
| Amadou et al. 2013, multiple countries <sup>2</sup>    | Systematic review and meta-analysis                                                                                                   | 18 case-control studies (14,429 cases and 22,754 controls) and 11 cohort studies (5,917 cases, 1,519,500 person-years) | BMI: overall and by ethnicity                                                 | <u>RR for premenopausal breast cancer</u><br>BMI (per 5kg/ m <sup>2</sup> ), overall, Asian, African, and Caucasian: 0.95 (95% CI, 0.94-0.97), 1.05 (95% CI, 1.01-1.09), 0.95 (95% CI, 0.91-0.98), and 0.93 (95% CI, 0.91-0.95)                                                                                                                                                                                                                                                                   |
| Band et al. 2002, Canada <sup>3</sup>                  | Case-control study                                                                                                                    | 318 premenopausal breast cancer cases and 340 controls                                                                 | Less than 5 years of smoking initiation from the onset of menarche            | <u>OR for premenopausal breast cancer</u><br><5 years of smoking initiation from the onset of menarche (vs. never smoking): OR, 1.77 (95% CI; 1.22-2.57)                                                                                                                                                                                                                                                                                                                                          |
| Bergstrom et al. 2001, multiple countries <sup>4</sup> | Meta-analysis: 7 case control studies and 2 cohort studies (premenopausal); 9 case-control studies, 4 cohort studies (postmenopausal) | 6,533 premenopausal breast cancer cases and >13,100 postmenopausal breast cancer cases                                 | BMI                                                                           | <u>RR for premenopausal breast cancer</u><br>BMI (per 1 kg/ m <sup>2</sup> ): 0.98 (95% CI, 0.97-0.99)<br><u>RR for postmenopausal breast cancer:</u><br>BMI (per 1 kg/ m <sup>2</sup> ): 1.02 (95% CI, 1.02-1.03)                                                                                                                                                                                                                                                                                |
| Chan et al. 2019, multiple countries <sup>5</sup>      | Systematic review and meta-analysis: 126 cohort studies                                                                               | 8.53 million women (22,900 premenopausal and 103,000 postmenopausal breast cancer cases)                               | Vigorous activity                                                             | <u>RR for premenopausal breast cancer</u><br>Vigorous activity (vs. no vigorous activity): RR, 0.79 (95% CI, 0.69-0.91)<br><u>RR for postmenopausal breast cancer</u><br>Vigorous activity (vs. no vigorous activity): RR, 0.90 (95% CI, 0.85-0.95)                                                                                                                                                                                                                                               |
| Chen et al. 2011, U.S. <sup>6</sup>                    | Prospective cohort study                                                                                                              | 105,986 women (946 premenopausal breast cancer cases)                                                                  | Alcohol consumption                                                           | <u>RR for premenopausal breast cancer</u><br>Alcohol consumption (vs. 0 gram/day): 0.1-4.9 g/day: RR, 0.97 (95% CI, 0.82-1.15), 5-9.9 g/day: RR, 1.15 (95% CI, 0.93-1.43), 10-19.9 g/day: RR, 1.11 (95% CI, 0.89-1.38), 20-29.9 g/day: RR, 0.96 (95% CI, 0.66-1.39), ≥30 g/day: RR, 1.35 (95% CI, 0.97-1.88), P for trend=0.03                                                                                                                                                                    |
| Clavel-Chapelon et al. 2002, France <sup>7</sup>       | Prospective cohort studies                                                                                                            | 100,000 women aged 40-65 years at baseline (1,718 breast cancer cases)                                                 | Age at menarche                                                               | <u>RR for premenopausal breast cancer</u><br>Age at menarche (vs <12 years): 12 years: RR, 0.71 (95% CI, 0.54-0.92), 13 years: RR, 0.84 (95% CI, 0.66-1.08), 14 years: RR, 0.72 (95% CI, 0.54-0.96), 15+ years: RR, 0.66 (95% CI, 0.45-0.97)<br><u>RR for postmenopausal breast cancer</u><br>Age at menarche (vs <12 years): 12 years: RR, 1.02 (95% CI, 0.85-1.21), 13 years: RR, 0.86 (95% CI, 0.71-1.03), RR, 14 years: RR, 0.93 (95% CI, 0.77-1.13), 15+ years: RR, 0.84 (95% CI, 0.66-1.07) |

|                                                                                                |                                                              |                                                                                          |                                                                   |                                                                                                                                                                                                                                                                                                                                 |
|------------------------------------------------------------------------------------------------|--------------------------------------------------------------|------------------------------------------------------------------------------------------|-------------------------------------------------------------------|---------------------------------------------------------------------------------------------------------------------------------------------------------------------------------------------------------------------------------------------------------------------------------------------------------------------------------|
| Collaborative Group on Hormonal Factors in Breast Cancer 2012, multiple countries <sup>8</sup> | Meta-analysis: 35 cohort studies and 82 case control studies | 118,964 women with breast cancer and 306,091 without the disease                         | Age at menarche                                                   | <u>RR for breast cancer (&lt;50 years)</u><br>Age at menarche (per one-year decrease): cohort studies: RR, 1.05 (95% CI, 1.02-1.07), case-control studies (population controls): RR, 1.07 (95% CI, 1.05-1.08), case-control studies (hospital controls): RR, 1.08 (95% CI, 1.06-1.10)                                           |
| Collaborative Group on Hormonal Factors in Breast Cancer 1996, multiple countries <sup>9</sup> | Meta-analysis: 54 studies                                    | 53,297 breast cancer cases and 100,239 women without the disease                         | Last use of oral contraceptives <5 years ago and 5-9 years ago    | <u>RR for premenopausal breast cancer</u><br>Last use of oral contraceptives (vs. never use): <5 years ago: RR, 1.22 (95% CI, 1.19-1.26), 5-9 years: RR, 1.07 (95% CI, 1.04-1.11)                                                                                                                                               |
| Fravid et al. 2014, U.S. <sup>10</sup>                                                         | Prospective cohort study                                     | 88,804 women and 2,830 breast cancer                                                     | Animal fat intake                                                 | <u>RR for premenopausal breast cancer</u><br>Animal fat intake highest quintile (vs. lowest): RR, 1.21 (95% CI, 1.02-1.44)                                                                                                                                                                                                      |
| Godinho-Mota et al. 2019, Brazil <sup>11</sup>                                                 | Case-control study                                           | 80 breast cancer cases and 133 controls among premenopausal women                        | Alcoholic habit                                                   | <u>OR for premenopausal breast cancer</u><br>Alcoholic habit (vs. no alcohol habit): OR, 2.91 (95% CI, 1.58-5.38)                                                                                                                                                                                                               |
| Johnson et al. 2005, multiple countries <sup>12</sup>                                          | Meta-analysis of 19 studies                                  | 3,000 cases, >330,000 controls for passive smoking, >188,800 controls for active smoking | Active and passive smoking                                        | <u>RR for premenopausal breast cancer</u><br>Passive smoking (vs. not regularly exposed to tobacco smoke): RR, 1.68 (95% CI, 1.33-2.12)<br>Active smoking (vs. not regularly exposed to tobacco smoke): RR, 2.11 (95% CI, 1.31-3.40)                                                                                            |
| Kropp et al. 2001, Germany <sup>13</sup>                                                       | Population-based case control study                          | 706 breast cancer cases and 1,381 controls among women up to 50 years                    | Average ethanol intake                                            | <u>RR for breast cancer (&lt;50 years)</u><br>Average ethanol intake (vs 0 g/day): 1-5 g/day: RR, 0.71 (95% CI, 0.54-0.91), 6-11 g/day: RR, 0.67 (95% CI, 0.50-0.91), 12-18 g/day: RR, 0.73 (95% CI, 0.51-1.05), 19-30 g/day: RR, 1.10 (95% CI, 0.73-1.65), ≥31 g/day: RR, 1.94 (95% CI, 1.18-3.20)                             |
| Li et al. 2008, U.S. <sup>14</sup>                                                             | Population-based case-control study                          | 4,013 breast cancer cases and 4,069 controls in White and African American women         | Interval between age at menarche and age at first full-term birth | <u>OR for premenopausal breast cancer</u><br>Years between age at menarche and age at first full-term birth (vs ≤5 years), Whites: 6-10 years: OR, 1.5 (95% CI, 1.0-2.2), 11-15 years: OR, 1.5 (95% CI, 1.0-2.2), 16 years and above: OR, 1.5 (95% CI, 1.0-2.2)<br>There were not significant results for African Americans.    |
| Linos et al. 2010, U.S. <sup>15</sup>                                                          | Prospective cohort study                                     | 39, 268 premenopausal women and 455 breast cancer cases                                  | Adolescent total fat consumption                                  | <u>RR for premenopausal breast cancer</u><br>Total fat consumption highest quintile (vs. lowest): RR, 1.35 (95% CI, 1.00-1.81)                                                                                                                                                                                                  |
| Lynch et al. 1988, U.S. <sup>16</sup>                                                          | Cross sectional study                                        | 328 probands (consecutively ascertained patients from one oncology clinic)               | Family history of breast cancer diagnosed earlier than 40 years   | A family history of early onset breast cancer occurred more frequently among young (<40 years) breast cancer probands (9/45) than among older (≥40 years) breast cancer probands (3/283).                                                                                                                                       |
| Premenopausal Breast Cancer Collaborative. 2018, multiple countries <sup>17</sup>              | Pooled analysis of 19 prospective cohorts                    | 758, 592 women (13,082 breast cancer cases)                                              | BMI                                                               | <u>HR for premenopausal breast cancer (per 5 kg/m<sup>2</sup> increase)</u><br>Breast cancer (18-24 years): HR, 0.77 (95% CI, 0.73-0.80)<br>Breast cancer (25-34 years): HR, 0.85 (95% CI, 0.82-0.89)<br>Breast cancer (35-44 years): HR, 0.87 (95% CI, 0.85-0.89)<br>Breast cancer (45-54 years): HR, 0.88 (95% CI, 0.86-0.91) |

|                                                                    |                                                                            |                                                                                                      |                         |                                                                                                                                                                                                                                                                                                                                                                                                                                                                                                          |
|--------------------------------------------------------------------|----------------------------------------------------------------------------|------------------------------------------------------------------------------------------------------|-------------------------|----------------------------------------------------------------------------------------------------------------------------------------------------------------------------------------------------------------------------------------------------------------------------------------------------------------------------------------------------------------------------------------------------------------------------------------------------------------------------------------------------------|
| Renehan et al. 2008, multiple countries <sup>18</sup>              | Systematic review and meta-analysis: 34 datasets were included             | 2,559,829 women (7,930 premenopausal breast cancer cases, 23,909 postmenopausal breast cancer cases) | BMI                     | <u>RR for premenopausal breast cancer</u><br>BMI (per 5kg/ m <sup>2</sup> ): overall: 0.92 (95% CI, 0.88-0.97), North America: 0.91 (95% CI, 0.85-0.98), Europe and Australia: 0.89 (95% CI, 0.84-0.94), and Asia-Pacific: 1.16 (95% CI, 1.01-1.32)<br><u>RR for postmenopausal breast cancer</u><br>BMI (per 5kg/ m <sup>2</sup> ): all: 1.12 (95% CI, 1.08-1.16), North American: 1.15 (95% CI, 1.08-1.23), Europe and Australia: 1.09 (95% CI, 1.04-1.14), and Asia-Pacific: 1.31 (95% CI, 1.15-1.48) |
| Rosner et al. 2017, U.S. <sup>19</sup>                             | Prospective cohort study                                                   | 74,177 nurses and 4,965 breast cancer cases                                                          | Weight at age 18        | <u>HR for premenopausal breast cancer:</u><br>Weight (per 30 kg): 0.52 (95% CI, 0.39-0.71)<br><u>HR for postmenopausal breast cancer</u><br>Weight (per 30 kg): 0.81 (95% CI, 0.72-0.92)                                                                                                                                                                                                                                                                                                                 |
| Ursin et al. 1995, multiple countries <sup>20</sup>                | Meta-analysis: 19 case control studies and 4 cohort studies                | Premenopausal women                                                                                  | BMI                     | <u>RR for premenopausal breast cancer</u><br>BMI (per 8kg/ m <sup>2</sup> ) in cohort studies: RR, 0.70 (95% CI, 0.54-0.91),                                                                                                                                                                                                                                                                                                                                                                             |
| van den Brandt et al. 2021, multiple countries <sup>21</sup>       | Pooled analysis of 20 prospective cohort studies                           | 1,061,915 women (36,297 breast cancer cases)                                                         | Height                  | <u>RR for premenopausal breast cancer:</u><br>Height (per 5cm): 1.07 (95% CI, 1.04-1.10)<br><u>RR for postmenopausal breast cancer:</u><br>Height (per 5cm): 1.06 (95% CI, 1.05-1.08)                                                                                                                                                                                                                                                                                                                    |
| van den Brandt et al. 2017, Netherlands <sup>22</sup>              | Prospective cohort study                                                   | 62,573 women and 3,354 breast cancer cases                                                           | Smoking duration        | <u>HR for breast cancer:</u><br>Smoking duration before menopause (per 20 pack-years): 1.35 (95% CI, 1.10-1.65)<br><u>HR for postmenopausal breast cancer:</u><br>Smoking duration after menopause (per 20 pack-years): 0.47 (95% CI, 0.28-0.80)                                                                                                                                                                                                                                                         |
| van den Brandt et al. 2000, multiple countries <sup>23</sup>       | Meta-analysis: 7 prospective cohort studies                                | 337,819 women (4,385 breast cancer cases)                                                            | BMI                     | <u>RR for premenopausal breast cancer:</u><br>BMI (per 4kg/ m <sup>2</sup> ): 0.89 (95% CI, 0.81-0.97)<br><u>RR for postmenopausal breast cancer</u><br>BMI (per 4kg/ m <sup>2</sup> ): 1.07 (95% CI, 1.02-1.11)                                                                                                                                                                                                                                                                                         |
| World Cancer Research Fund, 2020, multiple countries <sup>24</sup> | Meta-analysis: 10 studies                                                  | 4227 breast cancer cases                                                                             | Alcohol consumption     | <u>RR for premenopausal breast cancer:</u><br>Alcohol consumption (per 10 g/day): 1.05 (95% CI, 1.02-1.08)                                                                                                                                                                                                                                                                                                                                                                                               |
| Xiao et al. 2019, multiple countries <sup>25</sup>                 | Systematic review and meta-analysis: 14 cohort and 18 case-control studies | Premenopausal and postmenopausal women                                                               | Western dietary pattern | <u>RR for premenopausal breast cancer</u><br>Western dietary pattern (vs. no western dietary pattern): RR, 1.18 (95% CI, 0.99-1.40)<br><u>RR for postmenopausal breast cancer</u><br>Western dietary pattern (vs. no western dietary pattern): RR, 1.20 (95% CI, 1.06-1.35)                                                                                                                                                                                                                              |

Abbreviations: BMI, body mass index; CI, confidence interval; HR, hazard ratio; OR, odds ratio; RR, relative risk.



Supplementary Table 3. Summary of studies on risk factors for early-onset colorectal cancer

| Study, country                                            | Study design                            | Participants                                                                                                                   | Exposures                                                                                              | Results (RR, HR, OR, or descriptive statistics)                                                                                                                                                                                                                                                                                                                                                                                                                                                                                 |
|-----------------------------------------------------------|-----------------------------------------|--------------------------------------------------------------------------------------------------------------------------------|--------------------------------------------------------------------------------------------------------|---------------------------------------------------------------------------------------------------------------------------------------------------------------------------------------------------------------------------------------------------------------------------------------------------------------------------------------------------------------------------------------------------------------------------------------------------------------------------------------------------------------------------------|
| Ali Khan et al. 2020, Sweden <sup>26</sup>                | Descriptive analysis of cohort data     | 12,614,256 individuals; 559,375 diabetic patients; 162,226 CRC patients (<50 years)                                            | Type 2 diabetes                                                                                        | <u>Early-onset vs. late-onset sporadic cancer</u><br>Diabetes diagnosis (vs. no diabetes): SIR, 1.9 (95% CI, 1.6-2.3) vs. SIR, 1.6 (95% CI, 1.6-1.7)<br><u>Early-onset vs. late-onset cancer with 1 first-degree relative: SIR (95% CI)</u><br>Diabetes diagnosis (vs. no diabetes): SIR, 6.9 (95% CI, 4.1-12) vs. SIR, 1.9 (95% CI, 1.4-2.5)<br><u>Cumulative risk for young-onset CRC</u><br>Diabetic patients: 0.3% (95% CI, 0.3%-0.3%) for sporadic CRC and 1.7% (95% CI, 0.3%-3.1%) for CRC with 1 a first-degree relative |
| Archambault et al. 2021, multiple countries <sup>27</sup> | Case-control study                      | 3,767 CRC cases and 4,049 controls aged younger than 50 years and 23,437 CRC cases and 35,311 controls aged 50 years and older | Lifestyle factors                                                                                      | <u>OR for early-onset CRC</u><br>Nonsteroidal anti-inflammatory drugs: OR, 1.43 (95% CI, 1.21–1.68)<br>lower educational attainment: OR, 1.10 (95% CI, 1.04–1.16)<br>alcohol abstinence: OR, 1.23 (95% CI, 1.08–1.39)<br>heavier alcohol use: OR, 1.25 (95% CI, 1.04–1.50)                                                                                                                                                                                                                                                      |
| Archambault et al. 2020, U.S. <sup>28</sup>               | Cross-sectional analysis                | 108,062 participants (50,023 CRC cases and 58,039 controls)                                                                    | Genetic risk variants (polygenic risk score (PRS) from 95 CRC associated common genetic risk variants) | <u>OR for CRC (per SD of PRS)</u><br>Entire sample: OR, 1.73 (95% CI, 1.54–1.95) for CRC <50 years, OR, 1.47 (95% CI, 1.37–1.58) for CRC >50 years<br>Excluding Lynch cases: OR, 1.82 (1.61–2.06) for CRC <50 years, OR, 1.49 (95% CI, 1.39–1.60) for CRC >50 years                                                                                                                                                                                                                                                             |
| Breau et al. 2020, multiple countries <sup>29</sup>       | Review and a meta-analysis of 5 studies |                                                                                                                                | Smoking, alcohol, obesity, elevated blood glucose, elevated blood pressure, elevated triglycerides     | <u>OR for early-onset adenoma and CRC</u><br>Smoking: OR, 1.69 (95% CI, 1.44-1.99), alcohol consumption: OR, 1.48 (95% CI, 1.40-1.57), obesity: OR, 1.45 (95% CI, 1.38-1.53), elevated blood glucose: OR, 1.69 (95% CI, 1.27-2.25), elevated blood pressure: OR, 1.56 (95% CI, 1.31-1.86), elevated triglycerides: OR, 1.51 (95% CI, 1.41-1.62)                                                                                                                                                                                 |
| Buc et al. 2006, France <sup>30</sup>                     | Cross-sectional study                   | 852 CRC cases (209 cases aged <60 years vs. 643 cases aged ≥60 years)                                                          | Smoking                                                                                                | <u>OR for CRC (&lt;60 years)</u><br>Tobacco smoking at least an average of 10 pack/years (yes vs. no): OR, 2.49 (95% CI, 1.57-3.95).                                                                                                                                                                                                                                                                                                                                                                                            |
| Chen et al. 2021, U.S. <sup>31</sup>                      | Nested case-control study               | 4,673 early-onset CRC cases and 40,832 controls vs. 14,928 CRC (50-64 years) and 132,120 matched controls                      | Metabolic syndrome                                                                                     | <u>OR for early-onset CRC</u><br>Metabolic syndrome (vs. no): OR, 1.25 (95% CI, 1.09-1.43), number of metabolic comorbid conditions (vs. 0): 1: OR, 1.15 (95% CI, 1.06-1.24), 2: OR, 1.22 (95% CI, 1.10-1.35), ≥3: OR, 1.15 (95% CI, 1.06-1.24), per 1 condition: OR, 1.12 (95% CI, 1.08-1.16)                                                                                                                                                                                                                                  |
| Chen et al. 2017, U.S. <sup>32</sup>                      | Cross-sectional study                   | 485 colorectal adenomas (<50 years, N=253 vs. >50 years, N=232)                                                                | Family history, hereditary factor                                                                      | <u>Early-onset vs. late-onset</u><br>Family history of CRC: 24.9% vs. 16.8%, P<0.03, confirmed or probable hereditary cancer syndromes: 6.7% vs. 0.86%, P<0.01                                                                                                                                                                                                                                                                                                                                                                  |
| Chung et al. 2010, Korea <sup>33</sup>                    | Cross-sectional study                   | 5,254 asymptomatic subjects who underwent screening colonoscopy (30-39 years, N=608, 40-                                       | Current smoking, family history (CR advanced adenoma <50 years)                                        | <u>OR for low risk adenoma (30-39 years)</u><br>current smoker (vs. never): OR, 2.05 (95% CI, 1.16-3.65), BMI (vs. <35.0kg/m <sup>2</sup> ): OR, 0.68 (95% CI, 0.31-1.48)<br><u>OR for low risk adenoma (40-49 years)</u>                                                                                                                                                                                                                                                                                                       |

|                                              |                       |                                                                                                                                                   |                                                                   |                                                                                                                                                                                                                                                                                                                                                                                                                                                                                                                                                                                                                                                                                                                                                                                                                                                                                                             |
|----------------------------------------------|-----------------------|---------------------------------------------------------------------------------------------------------------------------------------------------|-------------------------------------------------------------------|-------------------------------------------------------------------------------------------------------------------------------------------------------------------------------------------------------------------------------------------------------------------------------------------------------------------------------------------------------------------------------------------------------------------------------------------------------------------------------------------------------------------------------------------------------------------------------------------------------------------------------------------------------------------------------------------------------------------------------------------------------------------------------------------------------------------------------------------------------------------------------------------------------------|
|                                              |                       | 49 years, N=1,930, 50-59 years, N=2,716)                                                                                                          |                                                                   | current smoker (vs. never): OR, 1.37 (95% CI, 1.06-1.79), BMI (vs. <35.0kg/m <sup>2</sup> ): OR, 0.82 (95% CI, 0.61-1.12)<br><u>OR for low risk adenoma (50-59 years)</u><br>current smoker (vs. never): OR, 1.56 (95% CI, 1.24-1.95), BMI (vs. <35.0kg/m <sup>2</sup> ): OR, 1.47 (95% CI, 1.20-1.79)<br><u>OR for advanced adenoma (40-49 years)</u><br>current smoker (vs. never): OR, 1.58 (95% CI, 1.06-3.50), family history of CRC: OR, 2.54 (95% CI, 1.16-5.56)<br><u>OR for advanced adenoma (50-59 years)</u><br>current smoker (vs. never): OR, 2.03 (95% CI, 1.30-3.17), family history of CRC: OR, 1.53 (95% CI, 0.95-2.45)                                                                                                                                                                                                                                                                    |
| Elangovan et al. 2020, U.S. <sup>34</sup>    | Cross-sectional study | CRC (<50 years) cases vs. controls:<br>20-39 years: 11,930 vs. 9,471,990<br>40-49 years: 4160 vs. 4,413,690<br>50-74 years: 62,800 vs. 11,651,380 | Obesity, type 2 diabetes, hypertension, hyperlipidemia, smoking   | <u>CRC diagnosed at 20-39 years, men</u><br>obesity: OR, 1.92 (95% CI, 1.85-1.99), type 2 diabetes: OR, 3.42 (95% CI, 2.85-5.37), hypertension: OR, 3.43 (95% CI, 2.77-4.22), hyperlipidemia: OR, 3.42 (95% CI, 2.48-4.04), and smoking: OR, 1.77 (95% CI, 1.43-2.15)<br><u>CRC diagnosed at 20-39 years, women</u><br>obesity: OR, 2.22 (95% CI, 1.84-2.43), and hyperlipidemia: OR, 2.37 (95% CI, 2.22-2.52)<br><u>CRC diagnosed at 40-49 years, men</u><br>obesity: OR, 1.96 (95% CI, 1.87-1.99), type 2 diabetes: OR, 2.00 (95% CI, 1.75-1.99), hypertension: OR, 2.00 (95% CI, 1.85-2.15), hyperlipidemia: OR, 1.50 (95% CI, 1.35-1.67), smoking: OR, 1.25 (95% CI, 1.16-1.36)<br><u>CRC diagnosed at 20-39 years, women</u><br>obesity: OR, 1.49 (95% CI, 1.41-1.57), hypertension: OR, 1.27 (95% CI, 1.13-1.42), hyperlipidemia: OR, 1.47 (95% CI, 1.32-1.63), smoking: OR, 1.92 (95% CI, 1.85-1.99) |
| Fraser et al 1993, New Zealand <sup>35</sup> | Cross-sectional study | 1,651 colon cancer and 1,046 rectal cancer aged 15-64 years                                                                                       | Occupational physical activity (sedentary, intermediate vs. high) | <u>RR for colon cancer</u><br>Sedentary (vs. high activity): RR, 1.01 (0.45-2.30) for colon cancer diagnosed at 15-34 years, RR, 1.79 (95% CI, 1.21-2.63) for colon cancer diagnosed at 35-44 years, and RR, 1.45 (1.12-1.88) for colon cancer diagnosed at 45-54 years old<br><u>RR for rectal cancer</u><br>Sedentary (vs. high activity): RR, 2.85 (95% CI, 1.15-7.08) for rectal cancer diagnosed at 15-34 years, RR, 1.26 (95% CI, 0.69-2.31) for rectal cancer diagnosed at 35-44 years, and RR, 1.47 (95% CI, 1.04-2.08) for rectal cancer diagnosed at 45-54 years old                                                                                                                                                                                                                                                                                                                              |
| Fuchs et al. 1994, U.S. <sup>36</sup>        | Cross-sectional study | 32,085 men and 87,031 women (CRC: 148 men and 315 women, <50 years)                                                                               | First degree relatives                                            | <u>RR for early-onset CRC</u><br>First degree relatives (vs. no family history): CRC 30-44 years: RR, 4.63 (95% CI, 1.43-15.0), CRC 45-49 years: RR, 3.47 (95% CI, 1.62-7.44)<br>Female: CRC 30-44 years: RR, 4.66 (95% CI, 1.24-17.4), CRC 45-49 years: RR, 4.15 (95% CI, 1.83-9.44)<br>Male: No categories were not statistically significant.                                                                                                                                                                                                                                                                                                                                                                                                                                                                                                                                                            |
| Gausman et al. 2020, U.S. <sup>37</sup>      | Case-control study    | 269 patients with early-onset CRC vs. 2,802 with late-onset vs. 1,122 controls                                                                    | Family history of CRC, BMI, hyperlipidemia                        | CRC cases vs. control: OR<br>Family history of CRC: OR, 8.61 (95% CI, 4.83-15.75), hyperlipidemia: OR, 0.57 (95% CI, 0.38-0.83)<br><u>Early-onset vs. late-onset CRC: OR</u><br>Family history of CRC: OR, 2.87 (95% CI, 1.89-4.25), BMI (kg/m <sup>2</sup> ): OR, 0.98                                                                                                                                                                                                                                                                                                                                                                                                                                                                                                                                                                                                                                     |

|                                           |                                                    |                                                                                                                                                      |                                                              |                                                                                                                                                                                                                                                                                                                                                                                                                                                                                                                                                                                                                                                                                                                                                                                                                                                                                                                                                                                                                                                                                                   |
|-------------------------------------------|----------------------------------------------------|------------------------------------------------------------------------------------------------------------------------------------------------------|--------------------------------------------------------------|---------------------------------------------------------------------------------------------------------------------------------------------------------------------------------------------------------------------------------------------------------------------------------------------------------------------------------------------------------------------------------------------------------------------------------------------------------------------------------------------------------------------------------------------------------------------------------------------------------------------------------------------------------------------------------------------------------------------------------------------------------------------------------------------------------------------------------------------------------------------------------------------------------------------------------------------------------------------------------------------------------------------------------------------------------------------------------------------------|
|                                           |                                                    |                                                                                                                                                      |                                                              | (95% CI, 0.95-0.99)                                                                                                                                                                                                                                                                                                                                                                                                                                                                                                                                                                                                                                                                                                                                                                                                                                                                                                                                                                                                                                                                               |
| Giráldez et al. 2012, Spain <sup>38</sup> | Cross-sectional analysis                           | 191 early onset cancer vs. 1264 late onset cancer (>65 years)                                                                                        | Genetic risk factor                                          | <50 years vs. > 65 years: OR<br>In dominant inheritance model, risk allele carriers for rs3802842 (vs. no carriers): OR, 1.5 (95% CI, 1.1–2.05), P = 0.0096 and rs4779584 (vs. no carriers): OR, 1.39 (95% CI, 1.02–1.9), P = 0.0396<br>In codominant and additive inheritance model, homozygotes for rs10795668 risk allele vs. no carrier: 10.53% vs. 8.63 %, P= 0.02                                                                                                                                                                                                                                                                                                                                                                                                                                                                                                                                                                                                                                                                                                                           |
| Hall et al. 1996, U.K. <sup>39</sup>      | Cross-sectional study                              | 60 CRC cases (<45 years) and 200 CRC cases (all ages)                                                                                                | First degree relative                                        | CRC aged (<45 years): RR, 5.2 (p<0.0001)<br>CRC at all ages: RR, 2.3 (p<0.0001)                                                                                                                                                                                                                                                                                                                                                                                                                                                                                                                                                                                                                                                                                                                                                                                                                                                                                                                                                                                                                   |
| Heikkinen 2020, Finland <sup>40</sup>     | Descriptive analysis using prospective cohort data | 20,536 relatives of early-onset cancer patients (≤ 40 years)                                                                                         | Family history                                               | <u>SIR for early-onset CRC (≤ 40 years) relative to the general population</u><br>All first-degree relatives: SIR, 14 (95% CI, 9.72-18), offspring: SIR, 13 (95% CI, 7.20-21), father: SIR, 20 (95% CI, 7.21-43), mother: SIR, 14 (95% CI, 3.72-35), sibling: SIR, 13 (95% CI, 7.34-21)<br><u>Cumulative risk for offspring and sibling vs. population</u><br>1.37% (95% CI, 0.83-2.25%), 0.98% (95% CI, 0.58-1.64%) vs. 0.10%                                                                                                                                                                                                                                                                                                                                                                                                                                                                                                                                                                                                                                                                    |
| Hong et al. 2010, Korea <sup>41</sup>     | Cross-sectional study                              | 1,049 people who underwent their first colonoscopy screening (40-49 years: N=1,049 (CRC or adenoma =181) vs. 50-59 years: N=712 (CRC or adenoma=158) | BMI, abdominal obesity, metabolic syndrome                   | <u>OR for overall CRC or adenoma, age 40-49</u><br>BMI, 23.0-24.9 and ≥25 kg/m <sup>2</sup> (vs. >23.0): OR, 1.24 (95% CI, 0.82-1.87) and OR, 1.31 (95% CI, 0.87-1.97), abdominal obesity (vs.no): OR, 1.57 (95% CI, 1.12-2.21), metabolic syndrome (vs. no): OR, 1.56 (95% CI, 1.03-2.35)<br><u>OR for overall CRC or adenoma, 50-59 years</u><br>BMI, 23.0-24.9 and ≥25 kg/m <sup>2</sup> (vs. >23.0): OR, 1.25 (95% CI, 0.80-1.97) and OR, 1.09 (95% CI, 0.70-1.70), abdominal obesity (vs.no): OR, 1.04 (95% CI, 0.72-1.50)<br><u>OR for advanced CRC or adenoma, age 40-49</u><br>BMI, 23.0-24.9 and ≥25 kg/m <sup>2</sup> (vs. >23.0): OR, 1.69 (95% CI, 0.56-5.05) and OR, 2.12 (95% CI, 0.76-5.97), abdominal obesity: OR, 2.37 (95% CI, 1.06-5.27), metabolic syndrome: OR, 2.83 (95% CI, 1.23-6.53)<br><u>OR for advanced CRC or adenoma, age 50-59 years</u><br>BMI, 23.0-24.9 and ≥25 kg/m <sup>2</sup> (vs. >23.0): OR, 1.72 (95% CI, 0.65-4.57) and OR, 1.63 (95% CI, 0.63-4.23), abdominal obesity: OR, 1.14 (95% CI, 0.54-2.40), metabolic syndrome: OR, 1.39 (95% CI, 0.64-3.00) |
| Hur et al. 2021, U.S. <sup>42</sup>       | Prospective cohort study                           | 95,464 women (109 early-onset CRC, 1,358,142 person years)                                                                                           | Sugar-sweetened beverage intake in adulthood and adolescence | <u>RR for early-onset CRC</u><br>Sugar sweetened beverages ≥2 servings/day (vs. <1 serving/week) in adulthood: RR, 2.18 (95% CI, 1.10-4.35), artificially sweetened beverages ≥2 servings/day (vs.<1 serving/week): RR, 0.73 (95% CI, 0.42-1.27), fruit juice ≥2 servings/day (vs. <1 serving/week): RR, 1.20 (95% CI, 0.16-9.11)<br>Sugar sweetened beverages ≥2 servings/day (vs.<1 serving/week) in adolescence: RR, 3.41 (95% CI, 1.08-10.8)                                                                                                                                                                                                                                                                                                                                                                                                                                                                                                                                                                                                                                                  |
| Hussan et al. 2020, U.S. <sup>43</sup>    | Analysis of population-based program data          | 91,116 (7.2%) obese individuals vs. 1,181,127 (92.8%) nonobese individuals                                                                           | Obesity                                                      | <u>AAPC of cancer incidence: 20-49, 50-64, 65-74, and 75+ years</u><br>Overall CRC: +1.5, -1.5, -3.8, and -3.9, cancer resection with obesity vs. without obesity: +13.1, +10.3, +11.3 and +12.8 vs. -1.1, -1.0, -3.0, and -4.0                                                                                                                                                                                                                                                                                                                                                                                                                                                                                                                                                                                                                                                                                                                                                                                                                                                                   |
| Jung et al. 2017, Korea <sup>44</sup>     | Cross-sectional study                              | CRC or advanced adenoma=56,896 vs.                                                                                                                   | BMI, former smoker, current smoker                           | <u>OR for CRC or advanced adenoma</u><br>BMI (≥ 25 kg/m <sup>2</sup> ): OR, 1.04 (95% CI, 1.08-1.07), former smoker and current                                                                                                                                                                                                                                                                                                                                                                                                                                                                                                                                                                                                                                                                                                                                                                                                                                                                                                                                                                   |

|                                       |                          |                                                                                                                          |                                                                                                                                                   |                                                                                                                                                                                                                                                                                                                                                                                                                                                                                                                                                                                                                                                                                                                                                                                                                                                                                                                                                                                                                                                                                                                                                                                                                                                                                                                                                                                                                                                                                                                                                                           |
|---------------------------------------|--------------------------|--------------------------------------------------------------------------------------------------------------------------|---------------------------------------------------------------------------------------------------------------------------------------------------|---------------------------------------------------------------------------------------------------------------------------------------------------------------------------------------------------------------------------------------------------------------------------------------------------------------------------------------------------------------------------------------------------------------------------------------------------------------------------------------------------------------------------------------------------------------------------------------------------------------------------------------------------------------------------------------------------------------------------------------------------------------------------------------------------------------------------------------------------------------------------------------------------------------------------------------------------------------------------------------------------------------------------------------------------------------------------------------------------------------------------------------------------------------------------------------------------------------------------------------------------------------------------------------------------------------------------------------------------------------------------------------------------------------------------------------------------------------------------------------------------------------------------------------------------------------------------|
|                                       |                          | control=739                                                                                                              |                                                                                                                                                   | smoker (vs. never smoker): OR, 1.24 (95% CI, 0.99-1.55) and OR, 1.09 (95% CI, 1.56-2.32)                                                                                                                                                                                                                                                                                                                                                                                                                                                                                                                                                                                                                                                                                                                                                                                                                                                                                                                                                                                                                                                                                                                                                                                                                                                                                                                                                                                                                                                                                  |
| Jung et al. 2015, Korea <sup>45</sup> | Cross-sectional study    | Total 26,185 persons who had undergone a colonoscopy aged 30-59 years (13,678 aged 30-39 years, 12,507 aged 40-49 years) | Smoking, metabolic syndrome, obesity, fasting blood glucose, triglyceride level                                                                   | <p><u>OR for overall CRC or adenoma (30-39 years)</u><br/> Smoking 0-20 and ≥ 20 (vs. never smoker): OR, 1.43 (95% CI, 1.23-1.66) and OR, 1.93 (95% CI, 1.34-2.77), metabolic syndrome: OR, 1.43 (95% CI, 1.21-1.69), obesity (≥ 25.0 kg/m<sup>2</sup>) (vs. &lt;25 kg/m<sup>2</sup>): OR, 1.33 (95% CI, 1.16-1.54), fasting blood glucose (vs. &lt;100 mg/dL): OR, 1.36 (1.17-1.57), elevated triglyceride levels (vs. &lt;150 mg/dL): OR, 1.41 (95% CI, 1.22-1.64)</p> <p><u>OR for overall CRC or adenoma (40-49 years)</u><br/> Smoking 0-20 and ≥ 20 (vs. never smoker): OR, 1.16 (95% CI, 1.03-1.31) and OR, 1.54 (95% CI, 1.33-1.78), metabolic syndrome: OR, 1.22 (95% CI, 1.09-1.37), obesity (≥ 25.0 kg/m<sup>2</sup>) (vs. &lt;25 kg/m<sup>2</sup>): OR, 1.19 (95% CI, 1.07-1.32), fasting blood glucose (vs. &lt;100 mg/dL): OR, 1.15 (95% CI, 1.04-1.28), elevated triglyceride levels (vs. &lt;150 mg/dL): OR, 1.20 (1.08-1.34)</p> <p><u>OR for advanced CRC (30-39 years)</u><br/> Smoking ≥ 20 (vs. never smoker): OR, 4.42 (95% CI, 1.80-10.80), elevated triglyceride levels (vs. &lt;150 mg/dL): OR, 2.00 (95% CI, 1.26-3.16)</p> <p><u>OR for advanced CRC (40-49 years)</u><br/> Smoking ≥ 20 (vs. never smoker): OR, 1.64 (95% CI, 1.14-2.37), metabolic syndrome: OR, 1.38 (95% CI, 1.05-1.81), obesity (≥ 25.0 kg/m<sup>2</sup>) (vs. &lt;25 kg/m<sup>2</sup>): OR, 1.35 (95% CI, 1.05-1.74)</p>                                                                                                                                                 |
| Kim et al. 2021, U.S. <sup>46</sup>   | Prospective cohort study | 94,205 women (111 early-onset CRC, 1,250,560 person years)                                                               | Total vitamin D intake                                                                                                                            | <p><u>RR for early-onset CRC</u><br/> Total vitamin D intake (vs. &lt;300 IU/day): 300-450 IU/day, HR, 0.51 (95%CI, 0.30-0.86), ≥450 IU/day, HR, 0.49 (95%CI, 0.26-0.93)<br/> Total vitamin D intake (per 400 IU/day): HR, 0.46 (95%CI, 0.26-0.83)</p>                                                                                                                                                                                                                                                                                                                                                                                                                                                                                                                                                                                                                                                                                                                                                                                                                                                                                                                                                                                                                                                                                                                                                                                                                                                                                                                    |
| Kim et al. 2019, Korea <sup>47</sup>  | Cross-sectional study    | 72,356 asymptomatic individuals, 20-39 years who underwent colonoscopies (20-29 years, N=7,340, 30-39 years, N=65,016)   | Smoking, alcohol, obesity, metabolic syndrome (abdominal obesity, increased total triglycerides, increased blood pressure, fasting blood glucose) | <p><u>OR for colorectal neoplasm (cancer and adenoma) (20-29 years)</u><br/> Smoking: OR, 1.14 (95% CI, 0.90-1.43), alcohol intake ≥20 g/d (vs. &gt;20 g/day): OR, 1.16 (95% CI, 0.91-1.48), obesity (BMI ≥25.0 kg/m<sup>2</sup>): OR, 1.46 (95% CI, 1.17-1.82), metabolic syndrome: OR, 1.45 (95% CI, 0.92-2.27), abdominal obesity: 1.45 (95% CI, 1.14-1.84), elevated blood pressure: OR, 1.65 (95% CI, 1.19-2.29), elevated fasting glucose level: OR, 2.99 (95% CI, 1.38-6.45), elevated total triglycerides level: OR, 1.49 (95% CI, 1.12-1.97), reduced HDL: OR, 1.22 (95% CI, 0.87-1.72)</p> <p><u>OR for colorectal neoplasm (cancer and adenoma) (30-39 years)</u><br/> Smoking: OR, 1.29 (95% CI, 1.21-1.38), alcohol intake ≥20 g/d (vs &gt;20 g/day): OR, 1.25 (95% CI, 1.17-1.33), obesity (BMI ≥25.0 kg/m<sup>2</sup>): 1.26 (95% CI, 1.19-1.34), metabolic syndrome: OR, 1.33 (95% CI, 1.21-1.46), abdominal obesity: OR, 1.32 (95% CI, 1.23-1.40), elevated blood pressure: OR, 1.25 (95% CI, 1.16-1.35), elevated fasting glucose level: OR, 1.23 (95% CI, 1.00-1.52), elevated total triglycerides level: OR, 1.24 (95% CI, 1.16-1.33), reduced HDL: OR, 1.08 (95% CI, 1.00-1.17)</p> <p><u>OR for advanced colorectal neoplasm (cancer and adenoma) (20-29 years)</u><br/> Obesity (BMI ≥25.0 kg/m<sup>2</sup>): OR, 2.46 (95% CI, 1.24-4.87), abdominal obesity: 2.26 (95% CI, 1.12-4.54), elevated total triglycerides level: OR, 2.95 (95% CI, 1.41-6.21)</p> <p><u>OR for advanced colorectal neoplasm (cancer and adenoma) (30-39 years)</u></p> |

|                                       |                                     |                                                                                                                                              |                                                                                                                                                                                                                 |                                                                                                                                                                                                                                                                                                                                                                                                                                                                                                                                                                                                                                                                                                                                                                                                                                                                                                                                                                                                                                                                                                                    |
|---------------------------------------|-------------------------------------|----------------------------------------------------------------------------------------------------------------------------------------------|-----------------------------------------------------------------------------------------------------------------------------------------------------------------------------------------------------------------|--------------------------------------------------------------------------------------------------------------------------------------------------------------------------------------------------------------------------------------------------------------------------------------------------------------------------------------------------------------------------------------------------------------------------------------------------------------------------------------------------------------------------------------------------------------------------------------------------------------------------------------------------------------------------------------------------------------------------------------------------------------------------------------------------------------------------------------------------------------------------------------------------------------------------------------------------------------------------------------------------------------------------------------------------------------------------------------------------------------------|
|                                       |                                     |                                                                                                                                              |                                                                                                                                                                                                                 | Smoking: OR, 1.30 (95% CI, 1.05-1.61), alcohol intake $\geq 20$ g/d (vs. $>20$ g/day): OR, 1.34 (95% CI, 1.10-1.63), obesity (BMI $\geq 25.0$ kg/m <sup>2</sup> ): 1.33 (95% CI, 1.11-1.61), abdominal obesity: OR, 1.28 (95% CI, 1.05–1.57)                                                                                                                                                                                                                                                                                                                                                                                                                                                                                                                                                                                                                                                                                                                                                                                                                                                                       |
| Kim et al. 2019, Korea <sup>48</sup>  | Retrospective cross-sectional study | 41,702 asymptomatic people who underwent screening aged younger than 49 years old (393 advance colorectal neoplasm)                          | Alcohol consumption, smoking, obesity, glucose metabolism abnormality                                                                                                                                           | <u>OR for colorectal neoplasm (cancer and adenoma)</u><br>Heavy drinker (vs. never or non-heavy drinker): OR, 1.40 (95% CI, 1.13-1.74), current smoker (vs. never or former smoker): OR, 1.41 (95% CI, 1.14-1.75), obesity (vs. non-obesity): OR, 1.29 (95% CI, 1.04-1.59), HbA1c $\geq 6.5\%$ or glucose $\geq 100$ mg/dL (vs. no): OR, 1.55 (95% CI, 1.24-1.93).                                                                                                                                                                                                                                                                                                                                                                                                                                                                                                                                                                                                                                                                                                                                                 |
| Kim et al. 2016, Korea <sup>49</sup>  | Cross-sectional study               | A total of 70,428 Koreans from an occupational cohort (<50 years, N=59,782, $\geq 50$ years, N=10,646)                                       | Smoking, family history, diabetes related factors (fasting plasma glucose $\geq 100$ mg/dl or hemoglobin A1c $\geq 6.5\%$ , or use of diabetes medications), obesity, carcinoembryonic antigen, LDL-cholesterol | <u>HR for colorectal neoplasm (cancer and adenoma) &lt;50 years</u><br>Current smoking (vs. never/former smoking): OR, 1.37 (95% CI, 1.15-1.63), family history of CRC: OR, 1.46 (95% CI, 1.01-2.10), diabetes related factors: OR, 1.27 (95% CI, 1.06-1.54), obesity: OR, 1.23 (95% CI, 1.03-1.47), carcinoembryonic antigen: OR, 1.04(95% CI, 1.01-1.09), LDL-cholesterol: OR, 1.01 (95% CI, 1.01-1.02)<br><u>HR for colorectal neoplasm (cancer and adenoma) &lt;50 years, female</u><br>Age (per one year increase): OR, 1.08 (95% CI, 1.04-1.11), carcinoembryonic antigen (vs. no): OR, 1.12 (95% CI, 1.02-1.23)<br><br><u>HR for colorectal neoplasm (cancer and adenoma) &lt;50 years, male</u><br>Age (per one year increase): OR, 1.09 (95% CI, 1.07-1.10), current smoking (vs. never/former smoking): OR, 1.54 (95% CI, 1.27-1.87), family history of CRC: OR, 1.58 (95% CI, 1.06-2.36), diabetes related factors: OR, 1.34 (95% CI, 1.09-1.65), obesity: OR, 1.24 (95% CI, 1.02-1.50), LDL-cholesterol: OR, 1.01 (95% CI, 1.01-1.02), carcinoembryonic antigen (vs. no): OR, 1.03 (95% CI, 1.01-1.05) |
| Kwak et al. 2016, Korea <sup>50</sup> | Cross-sectional study               | Asymptomatic young adults aged 20-39 years<br>- Subjects with colorectal adenoma (N =497)<br>- Subject without colorectal adenoma (N =3,789) | Current smoking, alcohol consumption, obesity, abdominal obesity, elevated blood pressure, fasting glucose, triglyceride, HDL, metabolic syndrome                                                               | <u>OR for adenoma (20-39 years)</u><br>Current smoker (vs. nonsmoker): OR, 1.48 (95% CI, 1.14-1.91), alcohol consumption (vs. $\leq 40$ g /day): OR, 1.29 (95% CI, 1.03-1.63), obesity $\geq 25$ kg/m <sup>2</sup> (vs. $<25$ kg/m <sup>2</sup> ): OR, 1.03 (95% CI, 0.78-1.35), waist $\geq 90$ cm in men or $\geq 80$ in women): OR, 1.06 (95% CI, 0.79-1.43), elevated blood pressure: OR, 1.06 (95% CI, 0.84-1.33), elevated fasting glucose: OR, 1.32 (95% CI, 0.91-1.92), Elevated triglycerides: OR, 0.91 (95% CI, 0.68-1.23), reduced HDL: OR, 1.26 (95% CI, 0.91-1.75), metabolic syndrome: OR, 0.94 (95% CI, 0.59-1.48)                                                                                                                                                                                                                                                                                                                                                                                                                                                                                  |
| Lee et al. 2016, Korea <sup>51</sup>  | Cross-sectional study               | 2,819 subjects aged <50 years (non-adenoma, N=2264 vs. adenoma, N=555)                                                                       | Waist circumference, current smoking, current alcohol consumption                                                                                                                                               | <u>OR for colorectal adenoma</u><br>Waist circumference: $\geq 90$ cm for male, $\geq 80$ cm for female (vs. $<90$ cm, $<80$ cm, respectively): OR, 1.72 (95% CI, 1.15-2.55), Current smoking (vs. never smoker): OR, 1.6 (95% CI, 1.07-2.41)<br><u>OR for colorectal advanced adenoma</u><br>Current alcohol consumption: OR, 3.69 (95% CI, 1.08-12.54)                                                                                                                                                                                                                                                                                                                                                                                                                                                                                                                                                                                                                                                                                                                                                           |

|                                                          |                                                                 |                                                                                                |                                                                                                                                |                                                                                                                                                                                                                                                                                                                                                                                                                                                                                                                                                                                                                                                            |
|----------------------------------------------------------|-----------------------------------------------------------------|------------------------------------------------------------------------------------------------|--------------------------------------------------------------------------------------------------------------------------------|------------------------------------------------------------------------------------------------------------------------------------------------------------------------------------------------------------------------------------------------------------------------------------------------------------------------------------------------------------------------------------------------------------------------------------------------------------------------------------------------------------------------------------------------------------------------------------------------------------------------------------------------------------|
| Levi et al. 2017, Israel <sup>52</sup>                   | Prospective cohort study                                        | 1,794,570 adolescents who underwent compulsory examinations in late adolescence                | Adolescent BMI (US CDC criteria)<br>-underweight: <5th<br>-healthy weight: 5th-85th<br>-overweight: 85th-95th<br>-obese: >95th | <u>HR for CRC ≤35 years</u><br>Underweight, overweight, and obese (vs. healthy weight): HR, 1.45 (95% CI, 1.03-2.06), HR,1.56 (95% CI, 1.13-2.15), HR,1.11 (95% CI, 0.61-2.03)<br><u>HR for CRC 36-45 years</u><br>Underweight, overweight, and obese (vs. healthy weight): HR,1.21 (95% CI, 0.91-1.60), HR,1.35 (95% CI, 1.04-1.76), HR, 1.58 (95% CI, 1.02-2.44)<br><u>HR for CRC &gt;45 years</u><br>Underweight, overweight, and obese (vs. healthy weight): HR, 0.92 (95% CI, 0.75-1.13), HR,1.39 (95% CI, 1.18-1.62), HR,1.74 (95% CI, 1.33-2.27)                                                                                                    |
| Liu et al. 2019, U.S. <sup>53</sup>                      | Prospective cohort study                                        | 85,256 women (114 cases of early-onset CRC), 1,196, 452 person-years of follow-up              | BMI                                                                                                                            | <u>RR for early-onset CRC</u><br>Current BMI 25.0-29.9 and ≥30 (vs.18.5-22.9 kg/m <sup>2</sup> ): RR,1.37 (95% CI, 0.81-2.36) and RR,1.93 (95% CI, 1.15-3.25), 5 unit increase of BMI: RR,1.20 (95% CI, 1.05-1.38) (P =0.01 for trend), BMI at 18 years 25.0-29.9 and ≥30 (vs.18.5-22.9 kg/m <sup>2</sup> ): RR, 1.32 (95% CI, 0.80-2.16) and RR, 1.63 (95% CI, 1.01-2.61), 5 unit increase of BMI at 18 years: RR, 1.06 (95% CI, 0.81-1.40), weight gain of 20-39.9 kg, ≥40 kg (vs. loss or gain <5.0 kg) since 18 years: RR,1.65 (95% CI, 0.96-2.81), RR, 2.15 (95% CI, 1.01-4.55), 5 kg increase of weight since 18 years: RR, 1.09 (95% CI, 1.02-1.16) |
| McDowell et al. 2021, Sweden <sup>54</sup>               | Case-control studies                                            | 7,903 CRC cases (including 445 early-onset CRC cases) and 30,418 controls                      | Antibiotics use                                                                                                                | <u>OR for early-onset colon cancer</u><br>Antibiotics use (vs. no use): HR, 1.49 (95% CI, 1.07-2.07)                                                                                                                                                                                                                                                                                                                                                                                                                                                                                                                                                       |
| Nguyen et al. 2022, Sweden. <sup>55</sup>                | Case-control study                                              | 54,804 cases of CRC (2,557 early-onset CRCs) and 261,089 controls                              | Sedentary TV viewing time                                                                                                      | <u>OR for early-onset CRC</u><br>Previous antibiotics use: OR, 1.06 (95% CI, 0.96-1.17)                                                                                                                                                                                                                                                                                                                                                                                                                                                                                                                                                                    |
| Nguyen et al. 2018, U.S. <sup>56</sup>                   | Prospective cohort study                                        | 116,430 female nurses ages 25-42 years at enrollment in 1989 [118 early-onset CRC (<50 years)] | Sedentary TV viewing time                                                                                                      | <u>RR for early-onset CRC</u><br>Viewing time, 7.1-14 hours and >14 hours/week (vs. ≤7 hours): RR, 1.12 (95% CI, 0.72-1.75) and RR, 1.69 (95% CI, 1.07-2.67), P <sub>trend</sub> =0.03<br>Individuals without CRC family history: RR, 0.99 (95% CI, 0.61-1.61) and RR, 1.83 (95% CI, 1.15-2.95), P <sub>trend</sub> =0.02                                                                                                                                                                                                                                                                                                                                  |
| O'Sullivan et al. 2021, multiple countries <sup>57</sup> | Systematic review and a meta-analysis: 20 studies were included |                                                                                                | CRC history in a first-degree relative, hyperlipidemia, obesity, alcohol consumption, and smoking                              | <u>RR for early-onset CRC</u><br>CRC history in a first-degree relative (vs.no): RR, 4.21 (95% CI, 2.61-6.79), hyperlipidemia (vs.no): RR, 1.62 (95% CI, 1.22-2.13), Obesity (vs. normal): RR, 1.54 (95% CI, 1.01-2.35), high alcohol consumption (vs. non-drinkers): RR, 1.71 (95% CI, 1.62-1.80), smoking (vs. never smoking): RR, 1.35 (95% CI, 0.81-2.25)                                                                                                                                                                                                                                                                                              |
| Pearlman et al. 2017, U.S. <sup>58</sup>                 | Cross-sectional study                                           | 450 patients diagnosed with CRC diagnosed <50 years                                            | Gene mutation                                                                                                                  | <u>Prevalence of mutation: %</u><br>Any pathogenic mutation: 72 (16%), Mismatch repair (MMR)-deficient tumors: 48 (10.7%), Lynch syndrome: 36 (8%), high or moderate penetrance gene mutation: 61 (13.6 %), low penetrance gene mutation: 11 (2.4%)                                                                                                                                                                                                                                                                                                                                                                                                        |
| Peters et al 1989, U.S. <sup>59</sup>                    | Case-control study                                              | 147 colorectal adenocarcinoma cases in white males <45 years old at diagnosis vs. 148 controls | Occupational physical activity                                                                                                 | <u>OR for transverse/descending colon cancer</u><br>Mainly sedentary (vs. moderately active): OR, 3.0 (95% CI, 1.2-7.2), very active (vs. moderately active): OR, 0.8 (95% CI, 0.2-2.7).                                                                                                                                                                                                                                                                                                                                                                                                                                                                   |

|                                                         |                            |                                                                                                                                         |                                                                                |                                                                                                                                                                                                                                                                                                                                                                                                                                                                                                                                                                                                                                                                                                 |
|---------------------------------------------------------|----------------------------|-----------------------------------------------------------------------------------------------------------------------------------------|--------------------------------------------------------------------------------|-------------------------------------------------------------------------------------------------------------------------------------------------------------------------------------------------------------------------------------------------------------------------------------------------------------------------------------------------------------------------------------------------------------------------------------------------------------------------------------------------------------------------------------------------------------------------------------------------------------------------------------------------------------------------------------------------|
| Rosato et al. 2013, Switzerland and Italy <sup>60</sup> | Case-control study         | 329 cases (≤45 years) and 1,361 controls                                                                                                | Family history, alcohol consumption, food consumption, micronutrient, diabetes | <p><u>OR for CRC (≤45 years)</u></p> <p>Family history in first-degree relatives (vs.no family history): OR, 4.5 (95% CI, 2.64-7.68), affected siblings (vs. no family history): OR 11.68 (95% CI, 2.97-45.9), alcohol ≥14 drinks/weeks: OR, 1.56 (95% CI, 1.12-2.16), 3rd tertile of processed meat, vegetables, fruit, and fish intake (1st tertile): OR, 1.56 (95% CI, 1.11-2.20), OR, 0.4 (95% CI, 0.28-0.56), OR, 0.75 (95% CI, 0.54-1.02), and OR, 0.78 (95% CI, 0.60-1.00), respectively, Beta carotene, vitamin C, vitamin E, and folate: OR, 0.52 (95% CI, 0.37-0.72), OR, 0.68 (95% CI, 0.49-0.94), OR, 0.38 (95% CI, 0.26-0.58), and OR, 0.59 (95% CI, 0.40-0.86), respectively.</p> |
| Sanford et al. 2020, U.S. <sup>61</sup>                 | Cross-sectional study      | 583,511 noninstitutionalized civilian adults, of which 321,975 were aged between 18-49 years                                            | Obesity, ethnicity                                                             | <p><u>Entire sample including age ≥ 50 years</u></p> <p>Interaction term of age and BMI: OR, 0.67 (95% CI, 0.47-0.94).</p> <p><u>Early-onset CRC vs. late-onset CRC: OR</u></p> <p>Non-Spanish Hispanic Latino (vs. Spanish Hispanic Latino): OR, 2.03 (95% CI, 1.07–3.84) vs. OR, 1.74 (95% CI, 1.43–2.11), BMI ≥30.0 kg/m<sup>2</sup> (vs.&lt;30): OR, 1.39 (95% CI, 1.00-1.92) vs. OR, 0.93 (95% CI, 0.85-1.03), current and former smoker (vs. non-smoker): OR, 1.51(95% CI, 1.10-2.08) vs. OR, 1.31 (95% CI, 1.20-1.43)</p>                                                                                                                                                                |
| Song et al. 2021, Sweden <sup>62</sup>                  | Case-control study         | 45,744 polyp cases (including 7,884 early-onset CRC cases) and 93,307 controls (15,837 controls for early-onset cases)                  | Antibiotics use                                                                | <p><u>OR for colorectal polyps</u></p> <p>Narrow-spectrum antibiotics (vs. no use): OR, 0.88 (95% CI, 0.78-0.88), broad-spectrum antibiotics (vs. no use): OR, 1.29 (95% CI, 1.14-1.45), Penicillin (vs. no use): OR, 0.87 (95% CI, 0.78-0.98), Tetracyclines (vs. no use): OR, 1.24 (95% CI, 1.08-1.42), Quinolones (vs. no use): OR, 1.33 (95% CI, 1.09-1.62), Sulfonamides and trimethoprim (vs. no use): OR, 1.37 (95% CI, 1.08-1.75), Cephalosporins and other non-penicillin beta-lactams (vs. no use): OR, 1.30 (95% CI, 1.05-1.61)</p>                                                                                                                                                  |
| Stoffel et al. 2018, U.S. <sup>63</sup>                 | Retrospective chart review | 430 individuals diagnosed with CRC age<50                                                                                               | Germline mutation                                                              | <p><u>Prevalence of mutation: %</u></p> <p>Mismatch repair deficiency: 41/430 (10%), Lynch syndrome: 56/315 (those who underwent clinical germline sequencing) (25 with mutations in <i>MSH2</i>, 24 with mutations in <i>MLH1</i>, 5 with mutations in <i>MSH6</i>, and 2 with mutations in <i>PMS2</i>).</p>                                                                                                                                                                                                                                                                                                                                                                                  |
| Syed et al 2019, U.S. <sup>64</sup>                     | Case-control study         | CRC <50 years (N=5,710), CRC ≥ 50 years (N=63,010), and control without CRC (N=11,800,420)                                              | Family history, tobacco use, alcohol use, hyperlipidemia, obesity              | <p><u>CRC &lt;50 years vs. ≥50 years: OR</u></p> <p>Obesity: OR, 1.14 (95% CI, 1.08-1.20), tobacco use: OR, 0.83 (95% CI, 0.79-0.88), alcohol use: OR, 0.83 (95% CI, 0.78-0.88), family history: OR, 1.78 (95% CI, 1.67-1.90), hyperlipidemia: OR, 0.20 (95% CI, 0.19-0.22), hypertension: OR, 0.22(95% CI, 0.21-0.23)</p> <p><u>CRC &lt;50 years vs. control: OR</u></p> <p>Family history of cancer: OR, 11.66 (95% CI, 10.97-12.39), tobacco use: OR, 2.46 (95% CI, 2.33-2.59), alcohol use: OR, 1.71 (95% CI, 1.62-1.80), obesity: OR, 2.88 (95% CI, 2.74-3.04), hypertension: OR, 2.86 (95% CI, 2.70-3.03), hyperlipidemia: OR, 2.39 (95% CI, 2.23-2.55)</p>                               |
| Win et al 2011, multiple countries <sup>65</sup>        | Prospective cohort study   | Carriers of pathogenic mutations in the MMR genes <i>MLH1</i> , <i>MSH2</i> , <i>MSH6</i> , and <i>PMS2</i> (659 cases and 655 control) | BMI at 20 years old, CRC (mean age at CRC diagnosed=44.0, SD, 11.1)            | <p><u>HR for CRC</u></p> <p>BMI (per 5 kg/m<sup>2</sup> increase): HR, 1.30 (95% CI, 1.08-1.58), underweight, overweight, and obese (vs. normal weight): HR, 1.04 (95% CI, 0.66-1.64), HR, 1.12 (95% CI, 0.78-1.62), and HR, 2.35 (95% CI, 1.30-4.23)</p>                                                                                                                                                                                                                                                                                                                                                                                                                                       |

|                                       |                                     |                                                                                                             |                                                                                                                                                                                                                   |                                                                                                                                                                                                                                                                                                                                                                                                                                                                                                                                                                                                                                                                                                                                                                                                                                                                                                                                                                                                                                                                                                                                                                                                                                                                                                         |
|---------------------------------------|-------------------------------------|-------------------------------------------------------------------------------------------------------------|-------------------------------------------------------------------------------------------------------------------------------------------------------------------------------------------------------------------|---------------------------------------------------------------------------------------------------------------------------------------------------------------------------------------------------------------------------------------------------------------------------------------------------------------------------------------------------------------------------------------------------------------------------------------------------------------------------------------------------------------------------------------------------------------------------------------------------------------------------------------------------------------------------------------------------------------------------------------------------------------------------------------------------------------------------------------------------------------------------------------------------------------------------------------------------------------------------------------------------------------------------------------------------------------------------------------------------------------------------------------------------------------------------------------------------------------------------------------------------------------------------------------------------------|
| Yue et al. 2021, U.S. <sup>66</sup>   | Prospective cohort study            | 94,217 women aged 26-45 years at baseline and total 332 CRC cases (111 CRC <50 years and 222 CRC ≥50 years) | Hyperinsulinemic lifestyle: prime diet quality score, plant-based diet indices, empirical dietary index for hyperinsulinemia, empirical lifestyle Index for hyperinsulinemia. All was categorized into quartiles. | <u>HR for CRC &lt;50 years vs. ≥50 years</u><br>Prime diet quality score: HR, 0.90 (95% CI, 0.55-1.50) plant-based diet indices: HR, 1.24 (95% CI, 0.74-2.08), empirical dietary index for hyperinsulinemia: HR, 1.24 (95% CI, 0.72-2.16), empirical lifestyle Index for hyperinsulinemia: HR, 1.86 (95% CI, 1.12-3.07)<br><u>HR for CRC ≥50 years</u><br>Prime diet quality score: HR, 0.91 (95% CI, 0.62-1.31), plant-based diet indices: HR, 1.10 (95% CI, 0.75-1.62), empirical dietary index for hyperinsulinemia: HR, 1.51 (95% CI, 1.00-2.29), empirical lifestyle Index for hyperinsulinemia: HR, 1.20 (95% CI, 0.83-1.73)                                                                                                                                                                                                                                                                                                                                                                                                                                                                                                                                                                                                                                                                      |
| Zheng et al. 2021, U.S. <sup>67</sup> | Retrospective cross-sectional study | 29,474 women (1,157 early-onset adenomas diagnosed before 50 years.)                                        | Diet quality: western dietary pattern,                                                                                                                                                                            | <u>OR for high-risk adenoma for malignancy</u><br>Western dietary pattern 5 <sup>th</sup> (highest) (vs. 1 <sup>st</sup> lowest): OR, 1.67 (95% CI, 1.18-2.37), prudent dietary pattern 5 <sup>th</sup> (highest) (vs. 1 <sup>st</sup> lowest): OR, 0.69 (95% CI, 0.48-0.98), Dietary Approaches-Stop Hypertension 5 <sup>th</sup> (highest) (vs. 1 <sup>st</sup> lowest): 0.65 (95% CI, 0.45-0.93), Alternative Mediterranean Diet 5 <sup>th</sup> (highest) (vs. 1 <sup>st</sup> lowest): 0.55 (95% CI, 0.38-0.79), Alternative Healthy Eating Index-2010 5 <sup>th</sup> (highest) (vs. 1 <sup>st</sup> lowest): 0.71 (95% CI, 0.51-1.01)<br><u>OR for low-risk adenoma for malignancy</u><br>Western dietary pattern 5 <sup>th</sup> (highest) (vs. 1 <sup>st</sup> lowest): OR, 1.25 (95% CI, 0.97-1.59), prudent dietary pattern 5 <sup>th</sup> (highest) (vs. 1 <sup>st</sup> lowest): OR, 0.91 (95% CI, 0.71-1.17), Dietary Approaches-Stop Hypertension 5 <sup>th</sup> (highest) (vs. 1 <sup>st</sup> lowest): OR, 1.01 (95% CI, 0.78-1.31), Alternative Mediterranean Diet 5 <sup>th</sup> (highest) (vs. 1 <sup>st</sup> lowest): OR, 1.00 (95% CI, 0.77-1.29), Alternative Healthy Eating Index-2010 5 <sup>th</sup> (highest) (vs. 1 <sup>st</sup> lowest): OR, 0.95 (95% CI, 0.74-1.23) |

Abbreviations: AAPC, average annual percent change; BMI, body mass index; CI, confidence interval; CRC, colorectal cancer; HR, hazard ratio; MMR, mismatch repair; OR, odds ratio; RR, relative risk; SD, standard deviation; SIR, standardized incidence ratio.



Supplementary Table 4. Summary of studies on risk factors for early-onset endometrial cancer

| Study, country                                       | Study design                    | Participants                                                                                                                                                                                                               | Exposures                                                                                                                                                                                                                                               | Results (RR, HR, OR, or descriptive statistics)                                                                                                                                                                                                                                                                                                                                                                                                                                                                                                                                                                                  |
|------------------------------------------------------|---------------------------------|----------------------------------------------------------------------------------------------------------------------------------------------------------------------------------------------------------------------------|---------------------------------------------------------------------------------------------------------------------------------------------------------------------------------------------------------------------------------------------------------|----------------------------------------------------------------------------------------------------------------------------------------------------------------------------------------------------------------------------------------------------------------------------------------------------------------------------------------------------------------------------------------------------------------------------------------------------------------------------------------------------------------------------------------------------------------------------------------------------------------------------------|
| Haidopoulos et al. 2010, U.S. <sup>68</sup>          | Case-control descriptive study  | 40 endometrial cancer patients (≤40 years) and 2 control groups: 1) 40 postmenopausal women previously diagnosed and treated with endometrial cancer; 2) 40 reproductive aged women (≤40 years) without endometrial cancer | age, height and weight, medical history, family history of malignancy in 1st degree relatives, parity and gravidity, use of oral contraceptives, age of menarche, menstruation characteristics, presenting symptom(s), smoking, history of hypertension | Early-onset endometrial cancer cases were more likely to be nulliparous (57.5% vs 17.5%; P=0.001), smokers (47.5% vs 5%; p<0.01), have history of irregular menstruation (45% vs 5%; P<0.001), have no history of hypertension (7.5% vs 55%; P<0.001), have family history of cancer (45% vs 17.5%; P=0.006) compared to later-onset cases. Early-onset endometrial cancer cases were more likely to be obese (BMI>30kg/m <sup>2</sup> ; 45% vs 20%; P=0.006), have history of irregular menstruation (45% vs 5%; P<0.001), have family history of cancer (45% vs 15%; P=0.003) compared to controls without endometrial cancer. |
| Raglan et al. 2019, multiple countries <sup>69</sup> | Meta-analysis                   |                                                                                                                                                                                                                            | 53 risk factors including anthropometric indices, dietary intake, physical activity, medical conditions, hormonal therapy use, biochemical markers, gynecological history, and smoking.                                                                 | RR for early-onset endometrial cancer<br>BMI (per 5 kg/m <sup>2</sup> ): RR, 1.49 (95% CI, 1.39-1.61)                                                                                                                                                                                                                                                                                                                                                                                                                                                                                                                            |
| Soliman et al. 2005, U.S. <sup>70</sup>              | Case only descriptive study     | 188 endometrial cancer patients who were premenopausal and diagnosed at age <50 years stratified by age <40 years (n=79), age 41-45 years (n=49), age 46-49 years (n=60)                                                   | Clinical data, including age at diagnosis, presenting symptoms, race, BMI, gravidity, parity, menstrual history, oral contraceptive pill use, history of diabetes, hypertension, and personal and family history of cancer                              | Early-onset endometrial cancer cases were more likely to be obese (BMI>30kg/m <sup>2</sup> ), with greater prevalence in the subset of patients aged <40 years (62%) compared to cases age 46-49 years (56%) in stratified analysis. 54% were nulliparous overall, with higher prevalence in patients aged <40 years (71% were nulliparous). 39% reported irregular menstruation with higher prevalence among patients aged <40 years (54% with irregular menstruation).                                                                                                                                                         |
| Walsh et al. 2008, U.K. <sup>71</sup>                | Case only cross-sectional study | 146 endometrial cancer patients age ≤50 years                                                                                                                                                                              | Tumor immunostaining of mismatch repair proteins, personal history of cancer, family history of cancer                                                                                                                                                  | Among early-onset endometrial cancer patients, 18% were presumptive Lynch syndrome (defined as loss of at least one MMR gene protein by immunohistochemistry in their tumors, and, if there was immunohistochemical absence of <i>MLH1</i> , negative <i>MLH1</i> hypermethylation status). Those with presumptive Lynch syndrome were more likely to have a positive family history of any cancer (37.5% vs 1.3%; P=0.001).                                                                                                                                                                                                     |

Abbreviations: BMI, body mass index; CI, confidence interval; MMR, mismatch repair; RR, relative risk.

Supplementary Table 5. Summary of studies on risk factors for early-onset esophageal cancer (adenocarcinoma)

| Study, country                                       | Study design                                   | Participants                                                                                                   | Exposures                                                                                                                                                                 | Results (RR, HR, OR, or descriptive statistics)                                                                                                                                                                                                                                                                                                                                                                                                                                                                               |
|------------------------------------------------------|------------------------------------------------|----------------------------------------------------------------------------------------------------------------|---------------------------------------------------------------------------------------------------------------------------------------------------------------------------|-------------------------------------------------------------------------------------------------------------------------------------------------------------------------------------------------------------------------------------------------------------------------------------------------------------------------------------------------------------------------------------------------------------------------------------------------------------------------------------------------------------------------------|
| Drahos et al. 2015, multiple countries <sup>72</sup> | Pooled 8 population-based case-control studies | 1,363 esophageal adenocarcinoma cases, 1,472 esophagogastric junction adenocarcinoma cases, and 5,728 controls | BMI, cigarette smoking, alcohol consumption, recurrent gastroesophageal reflux variables (i.e., heartburn, regurgitation) and use of nonsteroidal anti-inflammatory drugs | Compared to controls, recurrent gastroesophageal reflux (OR, 8.06; 95% CI, 4.52-14.4), BMI $\geq 30$ (vs $< 25$ kg/m <sup>2</sup> , 4.19; 95% CI, 2.23-7.87), and current smoking (vs. never smoking, OR, 2.72; 95% CI, 1.11-6.65) were associated with early-onset esophageal adenocarcinoma (age $< 50$ years). Early-onset cancers had stronger associations with recurrent gastroesophageal reflux (p-value for effect modification = 0.01) and BMI (p-value for effect modification=0.04) compared to later-onset cases. |

Abbreviations: BMI, body mass index; CI, confidence interval; OR, odds ratio.

Supplementary Table 6. Summary of studies on risk factors for early-onset head and neck cancer

| Study, country                                  | Study design                               | Participants                                                                                           | Exposures                                                    | Results (RR, HR, OR, or descriptive statistics)                                                                                                                                                                                                                                                                                                                                                                                                                                                                                                                                                                                                                                                                                                                                                                                                                                                                                                                                                                                                                                                                                                                                                                                                                                                                                                                                                                                                                                                                                                                                                                                                                                                                                                                                                                                                                                                                                                                                                                                                                                                                                                                                                                                                                                                                                                                                    |
|-------------------------------------------------|--------------------------------------------|--------------------------------------------------------------------------------------------------------|--------------------------------------------------------------|------------------------------------------------------------------------------------------------------------------------------------------------------------------------------------------------------------------------------------------------------------------------------------------------------------------------------------------------------------------------------------------------------------------------------------------------------------------------------------------------------------------------------------------------------------------------------------------------------------------------------------------------------------------------------------------------------------------------------------------------------------------------------------------------------------------------------------------------------------------------------------------------------------------------------------------------------------------------------------------------------------------------------------------------------------------------------------------------------------------------------------------------------------------------------------------------------------------------------------------------------------------------------------------------------------------------------------------------------------------------------------------------------------------------------------------------------------------------------------------------------------------------------------------------------------------------------------------------------------------------------------------------------------------------------------------------------------------------------------------------------------------------------------------------------------------------------------------------------------------------------------------------------------------------------------------------------------------------------------------------------------------------------------------------------------------------------------------------------------------------------------------------------------------------------------------------------------------------------------------------------------------------------------------------------------------------------------------------------------------------------------|
| Toporcov 2015, multiple countries <sup>73</sup> | Pooled analysis of 25 case-control studies | 2,010 cases and 4,042 controls with age ≤45 years; 17,700 cases and 22,704 controls with age >45 years | Smoking, alcohol consumption, diet, family history of cancer | <p><u>OR for head and neck cancer (&lt;45 years), female</u><br/>           Ever smoking (vs. never): OR, 1.58 (95% CI, 1.22-2.06), pack-years (vs. never), &gt;10 to 20 years: OR, 1.85 (95% CI, 1.26-2.72), &gt;20 to 30 years: OR, 2.59 (95% CI, 1.60-4.18), &gt;30 to 40 years: OR, 5.21 (95% CI, 1.75-9.90), &gt;40 to 50 years: OR, 7.09 (95% CI, 2.89-17.3), and &gt;50 years: OR, 6.50 (95% CI, 2.59-16.30), alcohol drinking (drinks/day x years) (vs. never), &gt;50 to 60 years: OR, 4.21 (95% CI, 1.23-14.4), &gt;60 years: OR, 2.78 (95% CI, 1.63-4.74), vegetable consumption 4<sup>th</sup> quartile (vs. 1<sup>st</sup> quartile): OR, 0.67 (95% CI, 0.45-0.99), fruit consumption 4<sup>th</sup> quartile (vs. 1<sup>st</sup> quartile): OR, 0.58 (95% CI, 0.38-0.88)</p> <p><u>OR for head and neck cancer (&lt;45 years), male</u><br/>           Ever smoking (vs. never): OR, 2.25 (95% CI, 1.86-2.71), pack-years (vs. never), &gt;10 to 20 years: OR, 2.09 (95% CI, 1.65-2.66), &gt;20 to 30 years: OR, 3.40 (95% CI, 2.66-4.35), &gt;30 to 40 years: OR, 5.29 (95% CI, 3.85-7.26), &gt;40 to 50 years: OR, 4.52 (95% CI, 3.11-6.56), and &gt;50 years: OR, 5.41 (95% CI, 3.79-7.71), ever alcohol drinking (vs. never): OR, 1.32 (95% CI, 1.06-1.65), alcohol drinking (drinks/day x years) (vs. never), &gt;60 years: OR, 2.31 (95% CI, 1.77-3.03), vegetable consumption (vs. 1<sup>st</sup> quartile): 3<sup>rd</sup> quartile, OR, 0.60 (95% CI, 0.47-0.76), 4<sup>th</sup> quartile, OR, 0.58 (95% CI, 0.45-0.74), fruit consumption (vs. 1<sup>st</sup> quartile): 2<sup>nd</sup> quartile, OR, 0.67 (95% CI, 0.53-0.84), 3<sup>rd</sup> quartile, OR, 0.70 (95% CI, 0.55-0.88), 4<sup>th</sup> quartile, OR, 0.57 (95% CI, 0.44-0.74).</p> <p><u>OR for head and neck cancer (&lt;45 years)</u><br/>           Family history of cancer in young relatives: OR, 2.27, (95% CI, 1.26, 4.10)</p> <p><u>OR for oral cavity cancer (&lt;45 years)</u><br/>           ever smoking (vs. never): OR, 1.91 (95% CI, 1.53-2.38)</p> <p><u>OR for oropharynx cancer (&lt;45 years)</u><br/>           ever smoking (vs. never): OR, 1.86 (95% CI, 1.47-2.37) and ever alcohol drinking (vs never): OR, 1.66 (95% CI, 1.25-2.21)</p> <p><u>OR for larynx cancer: (&lt;45 years)</u><br/>           ever smoking (vs. never): OR, 6.34 (95% CI, 3.98-10.1)</p> |

Abbreviations: CI, confidence interval; OR, odds ratio.

Supplementary Table 7. Summary of studies on risk factors for early-onset kidney cancer

| Study, country                             | Study design                         | Participants                                                                                                             | Exposures                   | Results (RR, HR, OR, or descriptive statistics)                                                                                                                                                                                     |
|--------------------------------------------|--------------------------------------|--------------------------------------------------------------------------------------------------------------------------|-----------------------------|-------------------------------------------------------------------------------------------------------------------------------------------------------------------------------------------------------------------------------------|
| Hemminki and Li 2004, Sweden <sup>74</sup> | Retrospective cross-sectional study. | 1,516 sons and 899 daughters RCCs aged 0-68, and 11,137 fathers and 7394 mothers RCCs.                                   | First degree relative       | <u>SIR for RCC (&lt;50 years)</u><br>Parental proband: SIR, 1.87 (95% CI, 1.17-2.84), sibling proband: SIR, 4.78 (95% CI, 1.90-9.91)                                                                                                |
| Leiba et al. 2013, Israel <sup>75</sup>    | Population-based cohort study        | 1,110,835 Jewish males 16-19 years (total 274 RCC cases)<br>Renal cancer (mean age at RCC diagnosis is 44.0 ± 8.3 years) | BMI in adolescence (age 17) | <u>HR for RCC</u><br>BMI (vs. <22.5 kg/m <sup>2</sup> ): 22.5-24.9 kg/m <sup>2</sup> , HR, 1.28 (95% CI, 0.96-1.73); 25.0-27.4 kg/m <sup>2</sup> , HR, 1.16 (95% CI, 0.72-1.87), ≥27.5 kg/m <sup>2</sup> , 2.43 (95% CI, 1.54-3.83) |

Abbreviations: RCC, renal cell carcinoma; CI, confidence interval; HR, hazard ratio; SIR, standardized incidence ratio.

Supplementary Table 8. Summary of studies on risk factors for early-onset liver cancer

| Study, country                           | Study design                                                                  | Participants                                                                                                                      | Exposures                                                                                         | Results (RR, HR, OR, or descriptive statistics)                                                                                                                      |
|------------------------------------------|-------------------------------------------------------------------------------|-----------------------------------------------------------------------------------------------------------------------------------|---------------------------------------------------------------------------------------------------|----------------------------------------------------------------------------------------------------------------------------------------------------------------------|
| Lam et al. 2004, Hong Kong <sup>76</sup> | Cross-sectional study                                                         | 121 HCC cases ≤40 years and 1,742 HCC cases > 40 years                                                                            | Cirrhosis                                                                                         | <u>Prevalence of cirrhosis: %</u><br>Early-onset vs. later-onset: 1/98 (1%) vs. 181/1435 (13%), P<0.0001                                                             |
| Liu et al. 2020, U.S. <sup>77</sup>      | Case-control study (model development), prospective cohort study (validation) | 173 at-risk population                                                                                                            | Viral infection history of many viruses                                                           | AUC of viral exposure signature developed from case-control study: 0.91 (95% CI, 0.87-0.96) at baseline and 0.98 (95% CI, 0.97-1) at diagnosis in validation cohort. |
| Park et al. 2012, Korea <sup>78</sup>    | Cross-sectional study                                                         | 2,242 patients with HCC diagnosed before 45 years old (HBV (+) =223 vs. HBV (-) =62)                                              | Family history                                                                                    | <u>Family history (+) vs. (-): % (p value)</u><br>Among 223 HBV (+) HCC: 191.1% vs. 12.1 % (p=0.028).<br>Among 62 HBV (-) HCC: 17.2% vs. 11.4 % (p=0.244)            |
| Wan et al. 2011, U.S. <sup>79</sup>      | Cross-sectional study                                                         | 168 cases of HCC in Asians with HBV (74% (124/168) ≥ 50 years vs. 199 HBV control and 26% (44/168) <50 years vs. 432 HBV control) | Sex, family history of HCC, history of smoking, (Early-onset HCC <40 for male and <50 for female) | <u>OR for early-onset HCC</u><br>Male (vs. female): OR, 2.7 (95% CI 1.0-7.0), Family history: OR, 2.7 (95% CI, 1.0-7.0), smoking history: OR, 3.4 (95% CI, 1.5-8.0)  |
| Yang et al. 2002, Taiwan <sup>80</sup>   | Prospective cohort study                                                      | 11,893 men (2,361 with HBsAg and 370 with both HBeAg and HBsAg), HCC cases diagnosed ≤ 55 years                                   | Hepatitis B antigen                                                                               | <u>RR for HCC</u><br>Positive only for HBsAg: RR, 6.1 (95% CI, 3.3-11.4), positive both for HBsAg and HBeAg (vs. negative for both): RR, 25.4 (95% CI, 13.3-48.6)    |

Abbreviations: AUC, area under the receiver operating characteristics curve; CI, confidence interval; HBeAg, hepatitis B e antigen; HBsAg, hepatitis B surface antigen; HBV, hepatitis B virus; HCC, hepatocellular carcinoma. OR, odds ratio; RR, relative risk.

Supplementary Table 9. Summary of relevant studies on early-life risk factors for multiple myeloma

| Study, country                                        | Study design                                  | Participants                             | Exposures                                                                                     | Results (RR, HR, OR, or descriptive statistics)                                                                                                                                                                                                                                                                                                                                                                                                                                                                                           |
|-------------------------------------------------------|-----------------------------------------------|------------------------------------------|-----------------------------------------------------------------------------------------------|-------------------------------------------------------------------------------------------------------------------------------------------------------------------------------------------------------------------------------------------------------------------------------------------------------------------------------------------------------------------------------------------------------------------------------------------------------------------------------------------------------------------------------------------|
| Birmann et al. 2017, multiple countries <sup>81</sup> | Pooled analysis of eight case-control studies | 2,318 myeloma cases and 9,609 controls   | Adult BMI, young adult BMI (age 25 or 30 years)                                               | <u>OR for overall multiple myeloma</u><br>Adult BMI (per 5 kg/m <sup>2</sup> ): OR, 1.09 (1.04-1.14), young adult BMI (per 5 kg/m <sup>2</sup> ): OR, 1.2 (1.1-1.3)                                                                                                                                                                                                                                                                                                                                                                       |
| Marinac et al. 2018, U.S. <sup>82</sup>               | Prospective cohort study                      | 49,374 men and 153,260 women (575 cases) | Cumulative average BMI, young adult BMI, BMI change (from young adulthood), physical activity | <u>HR for overall multiple myeloma</u><br>Cumulative average BMI (per 5 kg/m <sup>2</sup> ): HR, 1.20 (1.06-1.37)<br>Young adult BMI (per 5 kg/m <sup>2</sup> ): HR, 1.30 (1.13-1.50)<br>BMI change, physical activity: not significant<br><u>HR for overall multiple myeloma, male</u><br>Cumulative average BMI (per 5 kg/m <sup>2</sup> ): HR, 1.33 (1.09-1.63)<br>Young adult BMI (per 5 kg/m <sup>2</sup> ): HR, 1.42 (1.16-1.73)<br>BMI change, physical activity: not significant<br>For women, there was not significant results. |

Abbreviations: BMI, body mass index; CI, confidence interval; HR, hazard ratio; OR, odds ratio.

Supplementary Table 10. Summary of studies on risk factors for early-onset pancreatic cancer

| Study, country                                           | Study design          | Participants                                                                                                                                                                                          | Exposures                                                          | Results (RR, HR, OR, or descriptive statistics)                                                                                                                                                                                                                                                                                                                                                                                                                                                                                                                                                                                                                         |
|----------------------------------------------------------|-----------------------|-------------------------------------------------------------------------------------------------------------------------------------------------------------------------------------------------------|--------------------------------------------------------------------|-------------------------------------------------------------------------------------------------------------------------------------------------------------------------------------------------------------------------------------------------------------------------------------------------------------------------------------------------------------------------------------------------------------------------------------------------------------------------------------------------------------------------------------------------------------------------------------------------------------------------------------------------------------------------|
| Juo et al. 2018, U.S. <sup>83</sup>                      | Cross-sectional study | 28,053 of pancreatic cancers across all ages (non-obese: 26,834, obese: 942, morbidly obese: 277) vs. 1,743 pancreatic cancers diagnosed < 50 years (non-obese: 1,632, obese: 79, morbidly obese: 32) | Obesity (BMI > 30), morbid obesity (BMI > 40), smoking, alcoholism | <u>Association between obesity and onset age for entire sample</u><br>Obesity (vs. non-obese): -5.35 (± 0.72), P<0.05, morbid obesity (vs. nonobese): -8.19 (± 1.25), P<0.05                                                                                                                                                                                                                                                                                                                                                                                                                                                                                            |
| McWilliams et al. 2016, multiple countries <sup>84</sup> | Case-control study    | 1,954 pancreatic cancer cases <60 years (vs. 3,278 control)<br>226 pancreatic cancer cases <45 years (vs. 589 control)                                                                                | Alcohol, family history, smoking                                   | <u>OR for pancreatic cancer (&lt;60 years)</u><br>Alcohol ≥26 g/day (vs. <26 g/day): OR, 1.49 (95% CI, 1.21-1.84), smoking, 1-19 packs/year, 20-39 packs/year, and ≥40 packs/year (vs. no smoking): OR, 1.40 (95% CI, 1.18-1.65), OR, 2.29 (95% CI, 1.89-2.76), and OR, 2.79 (95% CI, 2.24-3.48)<br><u>OR for early-onset pancreatic cancer (&lt;45 years)</u><br>Alcohol ≥26 g/day (vs. <26 g/day): OR, 2.18 (95% CI, 1.17-4.09), family history (vs. no): OR, 2.88 (95% CI, 1.04-7.99), smoking, 1-19 packs/year, 20-39 packs/year, and ≥40 packs/year (vs. no smoking): OR, 1.39 (95% CI, 0.90-2.16), OR, 1.87 (95% CI, 1.08-3.23), and OR, 2.23 (95% CI, 0.91-5.47) |

Abbreviations: BMI, body mass index; CI, confidence interval; OR, odds ratio.

Supplementary Table 11. Summary of studies on risk factors for early-onset prostate cancer

| Study, country                              | Study design             | Participants                                                                                                                          | Exposures                                                       | Results (RR, HR, OR, or descriptive statistics)                                                                                                                                                                                                                                                                                                                                                                                                                                         |
|---------------------------------------------|--------------------------|---------------------------------------------------------------------------------------------------------------------------------------|-----------------------------------------------------------------|-----------------------------------------------------------------------------------------------------------------------------------------------------------------------------------------------------------------------------------------------------------------------------------------------------------------------------------------------------------------------------------------------------------------------------------------------------------------------------------------|
| Al-Jebari et al. 2019, Sweden <sup>85</sup> | Prospective cohort study | 1,181,490 fathers (in vitro fertilization, N=20,618, intra-cytoplasmic sperm injection, N=14,882 vs. natural conception, N=1,145,990) | Infertility treatment by assisted reproduction                  | Among men who became fathers, treatment by assisted reproduction was significantly associated with increased prostate cancer risk diagnosed before the age of 55 years.<br><u>HR for prostate cancer risk (&lt;55 years) (vs. natural conception)</u><br>Intra-cytoplasmic sperm injection: HR, 1.86 (95% CI, 1.25-2.77), in vitro fertilization: HR, 1.51 (95% CI, 1.09-2.08)                                                                                                          |
| Brandt et al. 2010, Sweden <sup>86</sup>    | Prospective cohort study | >11.8 million individuals including 2,229 prostate cancer patients diagnosed at <55 years, of whom 590 were familial.                 | Number and the diagnosis age of affected first-degree relatives | HR for prostate cancer increased with the number of affected relatives.<br><u>HR for prostate cancer (&lt;55 years) (affected first-degree relatives vs. non-affected first-degree relatives)</u><br>Father only: HR, 2.93 (95% CI, 2.64-3.25), brother only: HR, 4.41 (95% CI, 3.59-5.42), father and one brother: HR, 11.32 (8.47-15.13), two brothers: HR, 5.90 (95% CI, 2.45-14.20), father and two brothers: HR, 8.06 (95% CI, 2.02-32.27), three brothers: HR, 23.26 (5.81-93.1). |
| Lange et al. 2012, U.S. <sup>87</sup>       | Cross-sectional study    | 754 unrelated Caucasian American with prostate cancer diagnosed at age ≤ 55 years and 2,713 controls                                  | Genetic factors (14 SNPs)                                       | 13 of 14 SNPs were associated with early-onset prostate cancer. Early-onset prostate cancer diagnosed at age < 50 years had significantly more risk alleles (mean number of risk alleles=12.8) compared to those diagnosed at age 50-55 years (mean number of risk alleles=12.1; P=0.0003).                                                                                                                                                                                             |

Abbreviations: CI, confidence interval; HR, hazard ratio; RR, relative risk; SIR, standardized incidence ratio; SNP, single nucleotide polymorphism.



Supplementary Table 12. Summary of studies on risk factors for early-onset stomach cancer

| Study, country                              | Study design                     | Participants                                                                                                                                                                                         | Exposures                                                   | Results (RR, HR, OR, or descriptive statistics)                                                                                                                                                                                                                                                                                 |
|---------------------------------------------|----------------------------------|------------------------------------------------------------------------------------------------------------------------------------------------------------------------------------------------------|-------------------------------------------------------------|---------------------------------------------------------------------------------------------------------------------------------------------------------------------------------------------------------------------------------------------------------------------------------------------------------------------------------|
| Bacani JT et al. 2006, Canada <sup>88</sup> | Descriptive study                | 211 early-onset gastric cancer cases                                                                                                                                                                 | <i>CDH1</i> germline mutations                              | The overall frequency of germline <i>CDH1</i> mutations was 1.3% (1 case among 81 cases) for early-onset gastric cancer and 2.8% (1 case among 36 cases) for early-onset isolated cell gastric cancer.                                                                                                                          |
| Bergquist et al. 2019, U.S. <sup>89</sup>   | Ecological study at county-level | 75,225 gastric cancer patients (20-59 years: 18,608 vs 60 years and older: 56,617)                                                                                                                   | Smoking, binge drinking                                     | <u>20-59 years vs. ≥60 years: R<sup>2</sup></u><br>Smoking R <sup>2</sup> = 0.02989, p= 0.08964 vs. R <sup>2</sup> =-0.01444, P=0.7664, Binge drinking R <sup>2</sup> = 0.05726, P=0 .0307 vs. R <sup>2</sup> =-0.01584, P=0.9633                                                                                               |
| De et al. 2018, U.S. <sup>90</sup>          | Cross-sectional study            | 2615 patients under 40 years and 67,479 patients with age 40 years or older who had gastric adenocarcinoma                                                                                           | Sex, race/ethnicity                                         | Compared to older patients, adults under 40 years are more likely to be female (46% vs. 35%), more likely to be Hispanic (32% vs. 11%) and less likely to be White (69% vs. 76%).                                                                                                                                               |
| Giryas et al. 2018, U.S. <sup>91</sup>      | Ecological study at state-level  | 95,323 gastric cancer patients (early-onset aged 20-39 years: 3,247 vs. traditional-onset aged 40 years and older: 92,076)                                                                           | Smoking, heavy alcohol drinking                             | <u>20-39 years vs. ≥40 years: R<sup>2</sup></u><br>Current smoking: 0.089 (P=0.794) vs.0.221 (P=0.513), heavy alcohol drinking: 0.661 (P=0.027) vs.0.751 (P=0.008)                                                                                                                                                              |
| Gronberg et al. 2000, Sweden <sup>92</sup>  | Descriptive analysis             | 1,364 first-degree relatives of the men with prostate carcinoma in 62 families with hereditary prostate carcinoma                                                                                    | Hereditary prostate carcinoma in the first-degree relatives | <u>SIR for gastric carcinoma</u><br>≤65 years: SIR 3.39 (1.24-7.37) vs. >65 years: SIR 2.51 (1.20-4.62)                                                                                                                                                                                                                         |
| Juo et al. 2018, U.S. <sup>93</sup>         | Cross-sectional study            | 20,401 of gastric cancer across all ages (non-obese: 19,416, obese: 760, morbidly obese: 225) Among them, 2,321 of gastric cancer diagnosed at <50 (non-obese: 2,197, obese: 88, morbidly obese: 36) | Obesity (BMI >30), morbid obesity (BMI >40)                 | <u>Reduction in cancer diagnosis age (years)</u><br>Obesity (vs. nonobese): - 3.25 (± 0.53), P<0.05, morbid obesity (vs. nonobese): - 5.48 (± 0.96), P<0.05                                                                                                                                                                     |
| Kwak et al. 2015, Korea <sup>94</sup>       | Cross-sectional study            | 4,282 patients diagnosed with gastric cancer (924 patients with vs. 3,358 patients without first degree family history of gastric cancer)                                                            | Family history                                              | <u>Age at diagnosis of patient with first-degree family member diagnosed with gastric cancer before 50 years old vs. after 50 years old</u><br>Father: 47.7 ± 10.3 years vs. 55.3 ± 10.1 years (P< 0.001), Mother: 48.6 ± 10.4 years vs. 58.2 ± 9.5 years (P< 0.001), Sibling: 57.4 ± 11.5 years vs.64.3 ± 8.1 years (P< 0.001) |

|                                         |                       |                                                                                                                                |                            |                                                                                                                                                           |
|-----------------------------------------|-----------------------|--------------------------------------------------------------------------------------------------------------------------------|----------------------------|-----------------------------------------------------------------------------------------------------------------------------------------------------------|
| Rugge et al, 1999, Italy <sup>95</sup>  | Case-control study    | 105 gastric carcinoma patients (mean age: 34.4 years, range: 16-40 years) and an equal number of age- and sex-matched controls | <i>H. pylori</i> infection | <u>OR (95% CI) for gastric cancer</u><br>H. Pylori infection (vs. no infection): 2.79 (1.52-5.11)                                                         |
| Zhou F et al. 2016, China <sup>96</sup> | Cross-sectional study | 152 young patients (≤40 years) and 250 old patients (>40 years)                                                                | Sex, family history        | Compared to old gastric cancers, the young gastric cancer cohort was more predominant in women and showed more positive family history of gastric cancer. |

Abbreviations: CI, confidence interval; BMI, body mass index; OR, odds ratio; SIR, standardized incidence ratio.

1. Al-Ajmi, K.; Lophatananon, A.; Ollier, W.; Muir, K. R., Risk of breast cancer in the UK biobank female cohort and its relationship to anthropometric and reproductive factors. *PLoS One* 2018, 13 (7), e0201097.
2. Amadou, A., et al., Overweight, obesity and risk of premenopausal breast cancer according to ethnicity: a systematic review and dose-response meta-analysis. *Obes Rev* 2013, 14 (8), 665-78.
3. Band, P. R.; Le, N. D.; Fang, R.; Deschamps, M., Carcinogenic and endocrine disrupting effects of cigarette smoke and risk of breast cancer. *Lancet* 2002, 360 (9339), 1044-9.
4. Bergstrom, A.; Pisani, P.; Tenet, V.; Wolk, A.; Adami, H. O., Overweight as an avoidable cause of cancer in Europe. *Int J Cancer* 2001, 91 (3), 421-30.
5. Chan, D. S. M., et al., World Cancer Research Fund International: Continuous Update Project-systematic literature review and meta-analysis of observational cohort studies on physical activity, sedentary behavior, adiposity, and weight change and breast cancer risk. *Cancer Causes Control* 2019, 30 (11), 1183-1200.
6. Chen, W. Y.; Rosner, B.; Hankinson, S. E.; Colditz, G. A.; Willett, W. C., Moderate alcohol consumption during adult life, drinking patterns, and breast cancer risk. *JAMA* 2011, 306 (17), 1884-90.
7. Clavel-Chapelon, F.; Group, E. N. E., Differential effects of reproductive factors on the risk of pre- and postmenopausal breast cancer. Results from a large cohort of French women. *Br J Cancer* **2002**, 86 (5), 723-7.
8. Collaborative Group on Hormonal Factors in Breast, C., Menarche, menopause, and breast cancer risk: individual participant meta-analysis, including 118 964 women with breast cancer from 117 epidemiological studies. *Lancet Oncol* **2012**, 13 (11), 1141-51.
9. Collaborative Group on Hormonal Factors in Breast, C., Breast cancer and hormonal contraceptives: collaborative reanalysis of individual data on 53 297 women with breast cancer and 100 239 women without breast cancer from 54 epidemiological studies. *Lancet* 1996, 347 (9017), 1713-27.

10. Farvid, M. S.; Cho, E.; Chen, W. Y.; Eliassen, A. H.; Willett, W. C., Premenopausal dietary fat in relation to pre- and post-menopausal breast cancer. *Breast Cancer Res Treat* 2014, 145 (1), 255-65.
11. Godinho-Mota, J. C. M., et al., Sedentary Behavior and Alcohol Consumption Increase Breast Cancer Risk Regardless of Menopausal Status: A Case-Control Study. *Nutrients* 2019, 11 (8).
12. Johnson, K. C., Accumulating evidence on passive and active smoking and breast cancer risk. *Int J Cancer* 2005, 117 (4), 619-28.
13. Kropp, S.; Becher, H.; Nieters, A.; Chang-Claude, J., Low-to-moderate alcohol consumption and breast cancer risk by age 50 years among women in Germany. *Am J Epidemiol* 2001, 154 (7), 624-34.
14. Li, C. I., et al., Timing of menarche and first full-term birth in relation to breast cancer risk. *Am J Epidemiol* 2008, 167 (2), 230-9.
15. Linos, E.; Willett, W. C.; Cho, E.; Frazier, L., Adolescent diet in relation to breast cancer risk among premenopausal women. *Cancer Epidemiol Biomarkers Prev* 2010, 19 (3), 689-96.
16. Lynch, H. T.; Watson, P.; Conway, T.; Fitzsimmons, M. L.; Lynch, J., Breast cancer family history as a risk factor for early onset breast cancer. *Breast Cancer Res Treat* 1988, 11 (3), 263-7.
17. Premenopausal Breast Cancer Collaborative, G., et al., Association of Body Mass Index and Age With Subsequent Breast Cancer Risk in Premenopausal Women. *JAMA Oncol* 2018, 4 (11), e181771.
18. Renehan, A. G.; Tyson, M.; Egger, M.; Heller, R. F.; Zwahlen, M., Body-mass index and incidence of cancer: a systematic review and meta-analysis of prospective observational studies. *Lancet* 2008, 371 (9612), 569-78.
19. Rosner, B., et al., Weight and weight changes in early adulthood and later breast cancer risk. *Int J Cancer* 2017, 140 (9), 2003-2014.
20. Ursin, G.; Longnecker, M. P.; Haile, R. W.; Greenland, S., A meta-analysis of body mass index and risk of premenopausal breast cancer. *Epidemiology* 1995, 6 (2), 137-41.
21. van den Brandt, P. A., et al., Body size and weight change over adulthood and risk of breast cancer by menopausal and hormone receptor status: a pooled analysis of 20 prospective cohort studies. *Eur J Epidemiol* 2021, 36 (1), 37-55.
22. van den Brandt, P. A., A possible dual effect of cigarette smoking on the risk of postmenopausal breast cancer. *Eur J Epidemiol* 2017, 32 (8), 683-690.
23. van den Brandt, P. A., et al., Pooled analysis of prospective cohort studies on height, weight, and breast cancer risk. *Am J Epidemiol* 2000, 152 (6), 514-27.

24. World Cancer Research Fund/American Institute for Cancer Research. Continuous Update Project Expert Report 2018. Alcoholic drinks and the risk of cancer. Available at [dietandcancerreport.org](http://dietandcancerreport.org).
25. Xiao, Y., et al., Associations between dietary patterns and the risk of breast cancer: a systematic review and meta-analysis of observational studies. *Breast Cancer Res* 2019, 21 (1), 16.
26. Ali Khan, U., et al., Personal History of Diabetes as Important as Family History of Colorectal Cancer for Risk of Colorectal Cancer: A Nationwide Cohort Study. *Am J Gastroenterol* 2020, 115 (7), 1103-1109.
27. Archambault, A. N., et al., Nongenetic Determinants of Risk for Early-Onset Colorectal Cancer. *JNCI Cancer Spectr* 2021, 5 (3).
28. Archambault, A. N., et al., Cumulative Burden of Colorectal Cancer-Associated Genetic Variants Is More Strongly Associated With Early-Onset vs Late-Onset Cancer.
29. Breau, G.; Ellis, U., Risk Factors Associated With Young-Onset Colorectal Adenomas and Cancer: A Systematic Review and Meta-Analysis of Observational Research. *Cancer Control* 2020, 27 (1), 1073274820976670.
30. Buc, E., et al., Tobacco smoking: a factor of early onset of colorectal cancer. *Diseases of the colon* 2006, 49 (12), 1893-1896.
31. Chen, H., et al., Metabolic syndrome, metabolic comorbid conditions and risk of early-onset colorectal cancer. *Gut* 2021, 70 (6), 1147-1154.
32. Chen, F. W.; Sundaram, V.; Chew, T. A.; Ladabaum, U., Advanced-Stage Colorectal Cancer in Persons Younger Than 50 Years Not Associated With Longer Duration of Symptoms or Time to Diagnosis. *Clin Gastroenterol Hepatol* 2017, 15 (5), 728-737 e3.
33. Chung, S. J., et al., Prevalence and risk of colorectal adenoma in asymptomatic Koreans aged 40-49 years undergoing screening colonoscopy. *J Gastroenterol Hepatol* 2010, 25 (3), 519-25.
34. Elangovan, A., et al., Colorectal Cancer, Age, and Obesity-Related Comorbidities: A Large Database Study. *Dig Dis Sci* 2020.
35. Fraser, G.; Pearce, N., Occupational physical activity and risk of cancer of the colon and rectum in New Zealand males. *Cancer Causes Control* 1993, 4 (1), 45-50.
36. Fuchs, C. S., et al., A prospective study of family history and the risk of colorectal cancer. *New England Journal of Medicine* 1994, 331 (25), 1669-1674.
37. Gausman, V., et al., Risk Factors Associated With Early-Onset Colorectal Cancer. *Clin Gastroenterol Hepatol* 2020, 18 (12), 2752-2759 e2.
38. Giráldez, M. D., et al., Susceptibility genetic variants associated with early-onset colorectal cancer. *Carcinogenesis* 2012, 33 (3), 613-619.

39. Hall, N.; Bishop, D.; Stephenson, B.; Finan, P.; rectum, Hereditary susceptibility to colorectal cancer. *Diseases of the colon rectum* 1996, 39 (7), 739-743.
40. Heikkinen, S. M., et al., Familial aggregation of early - onset cancers. *International journal of cancer* 2020, 146 (7), 1791-1799.
41. Hong, S. N., et al., Prevalence and risk of colorectal neoplasms in asymptomatic, average-risk screenees 40 to 49 years of age. *Gastrointest Endosc* 2010, 72 (3), 480-9.
42. Hur, J., et al., Sugar-sweetened beverage intake in adulthood and adolescence and risk of early-onset colorectal cancer among women. *Gut* 2021.
43. Hussan, H., et al., Rising incidence of colorectal cancer in young adults corresponds with increasing surgical resections in obese patients. *Clinical translational gastroenterology* 2020, 11 (4).
44. Jung, Y. S.; Park, C. H.; Kim, N. H.; Lee, M. Y.; Park, D. I., Impact of Age on the Risk of Advanced Colorectal Neoplasia in a Young Population: An Analysis Using the Predicted Probability Model. *Dig Dis Sci* 2017, 62 (9), 2518-2525.
45. Jung, Y. S., et al., Risk factors for colorectal neoplasia in persons aged 30 to 39 years and 40 to 49 years. *Gastrointest Endosc* 2015, 81 (3), 637-645 e7.
46. Kim, H., et al., Total Vitamin D Intake and Risks of Early-Onset Colorectal Cancer and Precursors. *Gastroenterology* 2021, 161 (4), 1208-1217 e9.
47. Kim, N. H., et al., Prevalence of and Risk Factors for Colorectal Neoplasia in Asymptomatic Young Adults (20-39 Years Old). *Clin Gastroenterol Hepatol* 2019, 17 (1), 115-122.
48. Kim, J. Y., et al., Development and validation of a scoring system for advanced colorectal neoplasm in young Korean subjects less than age 50 years. *Intest Res* 2019, 17 (2), 253-264.
49. Kim, J. Y., et al., Different risk factors for advanced colorectal neoplasm in young adults. *World J Gastroenterol* 2016, 22 (13), 3611-20.
50. Kwak, J. Y., et al., Prevalence of colorectal adenomas in asymptomatic young adults: a window to early intervention? *Scand J Gastroenterol* 2016, 51 (6), 731-8.
51. Lee, S. E., et al., Characteristics of and risk factors for colorectal neoplasms in young adults in a screening population. *World J Gastroenterol* 2016, 22 (10), 2981-92.
52. Levi, Z., et al., Adolescent body mass index and risk of colon and rectal cancer in a cohort of 1.79 million Israeli men and women: A population-based study. *Cancer* 2017, 123 (20), 4022-4030.

53. Liu, P.-H., et al., Association of obesity with risk of early-onset colorectal cancer among women. *JAMA oncology* 2019, 5 (1), 37-44.
54. McDowell, R., et al., Oral antibiotic use and early-onset colorectal cancer: findings from a case-control study using a national clinical database. *Br J Cancer* 2021.
55. Nguyen, L. H., et al., Antibiotic Therapy and Risk of Early-Onset Colorectal Cancer: A National Case-Control Study. *Clin Transl Gastroenterol* 2022, 13 (1), e00437.
56. Nguyen, L. H., et al., Sedentary Behaviors, TV Viewing Time, and Risk of Young-Onset Colorectal Cancer. *JNCI Cancer Spectr* 2018, 2 (4), pky073.
57. O'Sullivan, D. E., et al., Risk Factors for Early-Onset Colorectal Cancer: A Systematic Review and Meta-analysis. *Clin Gastroenterol Hepatol* 2021.
58. Pearlman, R., et al., Prevalence and spectrum of germline cancer susceptibility gene mutations among patients with early-onset colorectal cancer. *JAMA oncology* **2017**, 3 (4), 464-471.
59. Peters, R. K.; Garabrant, D. H.; Yu, M. C.; Mack, T. M., A case-control study of occupational and dietary factors in colorectal cancer in young men by subsite. *Cancer Res* 1989, 49 (19), 5459-68.
60. Rosato, V., et al., Risk factors for young-onset colorectal cancer. *Cancer Causes Control* 2013, 24 (2), 335-341.
61. Sanford, N. N.; Giovannucci, E. L.; Ahn, C.; Dee, E. C.; Mahal, B. A., Obesity and younger versus older onset colorectal cancer in the United States, 1998–2017. *J Journal of gastrointestinal oncology* 2020, 11 (1), 121.
62. Song, M.; Nguyen, L. H.; Emilsson, L.; Chan, A. T.; Ludvigsson, J. F., Antibiotic Use Associated With Risk of Colorectal Polyps in a Nationwide Study. *Clin Gastroenterol Hepatol* 2021, 19 (7), 1426-1435 e6.
63. Stoffel, E. M., et al., Germline Genetic Features of Young Individuals With Colorectal Cancer. *Gastroenterology* 2018, 154 (4), 897-905 e1.
64. Syed, A. R., et al., Old vs new: Risk factors predicting early onset colorectal cancer. *World J Gastrointest Oncol* 2019, 11 (11), 1011-1020.
65. Win, A. K., et al., Body mass index in early adulthood and colorectal cancer risk for carriers and non-carriers of germline mutations in DNA mismatch repair genes. *Br J Cancer* 2011, 105 (1), 162-9.
66. Yue, Y., et al., Prospective evaluation of dietary and lifestyle pattern indices with risk of colorectal cancer in a cohort of younger women. *Ann Oncol* 2021, 32 (6), 778-786.

67. Zheng, X., et al., Comprehensive Assessment of Diet Quality and Risk of Precursors of Early-Onset Colorectal Cancer. *J Natl Cancer Inst* 2021, 113 (5), 543-552.
68. Haidopoulos, D., et al., Risk factors in women 40 years of age and younger with endometrial carcinoma. *Acta Obstet Gynecol Scand* 2010, 89 (10), 1326-30.
69. Raglan, O., et al., Risk factors for endometrial cancer: An umbrella review of the literature. *Int J Cancer* 2019, 145 (7), 1719-1730.
70. Soliman, P. T., et al., Risk factors for young premenopausal women with endometrial cancer. *Obstet Gynecol* 2005, 105 (3), 575-80.
71. Walsh, M. D., et al., Molecular, pathologic, and clinical features of early-onset endometrial cancer: identifying presumptive Lynch syndrome patients. *Clin Cancer Res* 2008, 14 (6), 1692-700.
72. Drahos, J., et al., Age-specific risk factor profiles of adenocarcinomas of the esophagus: A pooled analysis from the international BEACON consortium. *Int J Cancer* 2016, 138 (1), 55-64.
73. Toporcov, T. N., et al., Risk factors for head and neck cancer in young adults: a pooled analysis in the INHANCE consortium. *Int J Epidemiol* 2015, 44 (1), 169-85.
74. Hemminki, K.; Li, X., Age-specific familial risks for renal cell carcinoma with evidence on recessive heritable effects. *Kidney international* 2004, 65 (6), 2298-2302.
75. Leiba, A., et al., Adolescent obesity and paternal country of origin predict renal cell carcinoma: a cohort study of 1.1 million 16 to 19-year-old males. *J Urol* 2013, 189 (1), 25-9.
76. Lam, C. M., et al., Different presentation of hepatitis B-related hepatocellular carcinoma in a cohort of 1863 young and old patients - implications for screening. *Aliment Pharmacol Ther* 2004, 19 (7), 771-7.
77. Liu, J., et al., A viral exposure signature defines early onset of hepatocellular carcinoma. *Cell* 2020, 182 (2), 317-328. e10.
78. Park, C.-H., et al., Family history influences the early onset of hepatocellular carcinoma. *World Journal of Gastroenterology* 2012, 18 (21), 2661.
79. Wan, D. W., et al., Risk factors for early-onset and late-onset hepatocellular carcinoma in Asian immigrants with hepatitis B in the United States. *Am J Gastroenterol* 2011, 106 (11), 1994-2000.
80. Yang, H. I., et al., Hepatitis B e antigen and the risk of hepatocellular carcinoma. *N Engl J Med* 2002, 347 (3), 168-74.
81. Birmann, B. M., et al., Young Adult and Usual Adult Body Mass Index and Multiple Myeloma Risk: A Pooled Analysis in the International Multiple Myeloma Consortium (IMMC). *Cancer Epidemiol Biomarkers Prev* 2017, 26 (6), 876-885.

82. Marinac, C. R., et al., Body mass index throughout adulthood, physical activity, and risk of multiple myeloma: a prospective analysis in three large cohorts. *Br J Cancer* 2018, 118 (7), 1013-1019.
83. Juo, Y. Y., et al., Obesity Is Associated with Early Onset of Gastrointestinal Cancers in California. *J Obes* 2018, 2018, 7014073.
84. McWilliams, R. R., et al., Risk Factors for Early-Onset and Very-Early-Onset Pancreatic Adenocarcinoma: A Pancreatic Cancer Case-Control Consortium (PanC4) Analysis. *Pancreas* 2016, 45 (2), 311-6.
85. Al-Jebari, Y., et al., Risk of prostate cancer for men fathering through assisted reproduction: nationwide population based register study. *BMJ* 2019, 366, l5214.
86. Brandt, A.; Bermejo, J. L.; Sundquist, J.; Hemminki, K., Age-specific risk of incident prostate cancer and risk of death from prostate cancer defined by the number of affected family members. *European urology* 2010, 58 (2), 275-280.
87. Lange, E. M., et al., Early onset prostate cancer has a significant genetic component. *Prostate* 2012, 72 (2), 147-56.
88. Bacani, J. T., et al., CDH1/E-cadherin germline mutations in early-onset gastric cancer. *J Med Genet* 2006, 43 (11), 867-72.
89. Bergquist, J. R., et al., Early-onset gastric cancer is a distinct disease with worrisome trends and oncogenic features. *Surgery* 2019, 166 (4), 547-555.
90. De, B., et al., Gastric adenocarcinoma in young adult patients: patterns of care and survival in the United States. *Gastric Cancer* 2018, 21 (6), 889-899.
91. Giryes, A.; Oweira, H.; Mannhart, M.; Decker, M.; Abdel-Rahman, O., Exploring the differences between early-onset gastric cancer and traditional-onset gastric cancer. *J Gastrointest Oncol* 2018, 9 (6), 1157-1163.
92. Grönberg, H.; Bergh, A.; Damber, J. E.; Emanuelsson, M., Cancer risk in families with hereditary prostate carcinoma: A possible link between prostate, breast, and gastric carcinoma. *Cancer* 2000, 89 (6), 1315-1321.
93. Juo, Y. Y., et al., Obesity Is Associated with Early Onset of Gastrointestinal Cancers in California. *J Obes* 2018, 2018, 7014073.
94. Kwak, H. W., et al., Individual having a parent with early-onset gastric cancer may need screening at younger age. *World J Gastroenterol* 2015, 21 (15), 4592-8.
95. Rugge, M., et al., Patients younger than 40 years with gastric carcinoma: Helicobacter pylori genotype and associated gastritis phenotype. *Cancer* 1999, 85 (12), 2506-11.
96. Zhou, F.; Shi, J.; Fang, C.; Zou, X.; Huang, Q., Gastric Carcinomas in Young (Younger than 40 Years) Chinese Patients: Clinicopathology, Family History, and Postresection Survival. *Medicine (Baltimore)* 2016, 95 (9), e2873.
